1 **The D614G Mutation Enhances the Lysosomal Trafficking of SARS-CoV-2 Spike**

2

3 \*Chenxu Guo, \*Shang-Jui Tsai, \*Yiwei Ai, #Maggie Li, #Andrew Pekosz, @Andrea Cox,

4 ^Nadia Atai, and \*Stephen J. Gould

5

6 \*Department of Biological Chemistry, Johns Hopkins University, School of Medicine,

7 725 North Wolfe Street, Baltimore, MD, 21205

8

9 #Department of Microbiology and Immunology, Johns Hopkins University, School of

10 Public Health, 615 North Wolfe Street, Baltimore, MD 21205

11

12 @Department of Medicine, Department of Microbiology and Immunology, Johns Hopkins

13 University, School of Medicine, 725 North Wolfe Street, Baltimore, MD, 21205

14

15 ^Capricor, Inc. 8840 Wilshire Blvd, Beverly Hills, CA 90211

16

17

18

19

20

21

22 Correspondence:

23 Name: Stephen J. Gould Ph.D

24 Address: 725 North Wolfe Street, Baltimore, MD 21205

25 Phone number: 443 847 9918

26 Email: [sgould@jhmi.edu](mailto:sgould@jhmi.edu)

27

28

29 Running title: Lysosomal sorting of D614G spike

30

31 Key Words: COVID19, SARS-CoV-2, spike, lysosomes, protein sorting, Golgi,

32 coronavirus, infection

33

34 **Abstract**

35 The spike D614G mutation increases SARS-CoV-2 infectivity, viral load, and transmission  
36 but the molecular mechanism underlying these effects remains unclear. We report here  
37 that spike is trafficked to lysosomes and that the D614G mutation enhances the lysosomal  
38 sorting of spike and the lysosomal accumulation of spike-positive punctae in SARS-CoV-  
39 2-infected cells. Spike trafficking to lysosomes is an endocytosis-independent, V-  
40 ATPase-dependent process, and spike-containing lysosomes drive lysosome clustering  
41 but display poor lysotracker labeling and reduced uptake of endocytosed materials. These  
42 results are consistent with a lysosomal pathway of coronavirus biogenesis and raise the  
43 possibility that a common mechanism may underly the D614G mutation's effects on spike  
44 protein trafficking in infected cells and the accelerated entry of SARS-CoV-2 into  
45 uninfected cells.

## 46 **Introduction**

47 COVID-19 (coronavirus infectious disease 2019) is caused by infection with the  
48 enveloped virus SARS-CoV-2, a member of the betacoronavirus family (Coronaviridae  
49 Study Group of the International Committee on Taxonomy of, 2020; Zhou et al., 2020). In  
50 just one year, SARS-CoV-2 has infected >65 million people, killed >1.5 million people,  
51 and caused extensive morbidity among survivors. Of all the RNA viruses, coronavirus  
52 have the largest genomes, encoding more than two dozen proteins (Wang et al., 2020).  
53 However, leading vaccine candidates elicit immunity to just a single protein, spike (Poland  
54 et al., 2020), which mediates the first two steps in the replication cycle: cell binding and  
55 fusion of viral and cellular membranes.

56

57 SARS-CoV-2 entry leads to translation of its viral genomic RNA (gRNA) into the orf1a  
58 and orf1a/b polyproteins (V'Kovski et al., 2020). These are then processed to generate  
59 16 non-structural proteins (nsps) that reprogram the cell for viral replication and drive the  
60 synthesis of subgenomic viral mRNAs. These encode the four major structural proteins  
61 of mature virions (nucleocapsid (N), spike (S), membrane (M), and envelope (E)) and nine  
62 additional ORFs (3a, 3b, 6, 7a, 7b, 8, 9b, 9c, & 10) that together drive virus particle  
63 assembly and release. The spike, membrane and envelope proteins are sufficient to drive  
64 the formation of virus-like-particles and are thought to drive virion budding as well. This  
65 occurs following the synthesis of these proteins in the endoplasmic reticulum (ER) and  
66 their vesicle-mediated transport to the ER-Golgi intermediate compartment (ERGIC)  
67 (Ruch and Machamer, 2012; Ujike and Taguchi, 2015). As for how fully-formed virus  
68 particles (Yao et al., 2020) are released from infected cells, the prevailing model has been

69 that they are released by the biosynthetic secretory pathway (Ujike and Taguchi, 2015).  
70 However, Altan-Bonnet and colleagues recently demonstrated that egress of mouse  
71 hepatitis virus (MHV, another betacoronavirus) does not require the biosynthetic  
72 secretory pathway, and instead uses an Arl8-dependent, lysosomal pathway of egress  
73 (Ghosh et al., 2020).

74

75 Shortly after its entry into the human population, a variant strain of SARS-CoV-2 arose  
76 that displays multiple hallmarks of increased viral fitness, including a higher rate of  
77 transmission, elevated viral load *in vivo*, and enhanced infectivity *in vitro* (Hou et al., 2020;  
78 Korber et al., 2020; Lorenzo-Redondo et al., 2020) This variant contains a mutation in the  
79 spike gene, D614G, that replaces the aspartate at position 614 with a glycine. This  
80 mutation lies N-terminal to the polybasic site cleavage site (682RRAR685), a cleavage  
81 event that is essential to virus replication and generates the non-covalently associated N-  
82 terminal S1 and C-terminal S2 proteins (Hoffmann et al., 2020a; Hoffmann et al., 2020b).  
83 The spike S1 domain binds SARS-CoV-2 receptors, primarily angiotensin converting  
84 enzyme-2 (ACE2) (Hoffmann et al., 2020b; Matheson and Lehner, 2020; Zhou et al.,  
85 2020)(Wrapp et al., 2020) but also neuropilin-1 (Cantuti-Castelvetri et al., 2020; Daly et  
86 al., 2020), and yet, there is as yet no evidence that the D614G mutation alters the affinity  
87 of S1 for its receptors or for target cells. In fact, ultrastructural and biochemical analyses  
88 of matched D614 and G614 SARS-CoV-2 viruses show no differences in their  
89 appearance in electron micrographs, and also no difference in levels of virion-associated  
90 spike proteins (Hou et al., 2020).

91

92 Here we extend our understanding of the spike D614G mutation by demonstrating that it  
93 shifts spike protein trafficking towards the lysosome and away from organelles of the  
94 biosynthetic secretory pathway. This shift is reflected in the localization of SARS-CoV-2  
95 spike protein when expressed on its own, outside the context of an infected cell, and also  
96 in the context of SARS-CoV-2 infected cells. These and other results raise the possibility  
97 that that a single, lysosome-related mechanism may explain the pleiotropic effects of the  
98 D614G mutation on spike protein biogenesis, accelerated virus entry, and enhanced  
99 infectivity.

100

## 101 **Results**

102

### 103 ***Validating IFM-based SARS-CoV-2 serology tests***

104 Fluorescence microscopy offers many advantages as a serology test platform, including  
105 high sensitivity, broad dynamic range, use of proteins in their native conformation and  
106 biological context, ability to incorporate in-sample controls that minimize false positive  
107 and false negative results, and the potential to interrogate multiple antibody responses in  
108 a single sample. As a first step towards the development of such an assay for SARS-  
109 CoV-2 antibodies, we generated cell lines designed to express the SARS-CoV-2  
110 nucleocapsid, spike, or membrane proteins in response to doxycycline. These Htet1/N,  
111 Htet1/S\*\*, and Htet1/M cell lines were subjected to immunoblot analysis, which confirmed  
112 that each cell line expressed its cognate SARS-CoV-2 protein in response to doxycycline  
113 (***supplemental figure S1***). It should be noted that S\*\* corresponds to full-length spike  
114 that carries a pair of trimer-stabilizing proline mutations (986KV987 to 986PP987) and a  
115 quartet of substitutions at the S1/S2 protease cleavage site (682RRAR685 to  
116 682GSAG685), a form of spike that displays the prefusion conformation (Wrapp et al.,  
117 2020) and may therefore be particularly effective at capturing neutralizing anti-spike  
118 antibodies.

119

120 We next seeded Htet1/N, Htet1/S\*\*, and Htet1/M cells into 96-well glass-bottom tissue  
121 culture plates along with ~10% Htet1 cells (to serve as an internal negative control),  
122 incubated the cells overnight in doxycycline-containing media, and then processed these  
123 cells for immunofluorescence microscopy. In this format, the fixed adherent cells serve

124 as a solid support for capturing anti-SARS-CoV-2 antibodies from patient plasmas, the  
125 presence of human antibodies bound to the viral protein is detected using fluorescently-  
126 tagged donkey antibodies specific to human immunoglobulins (IgG, IgM, and IA),  
127 mCherry identifies the viral protein-expressing cells, and DAPI stains the nucleus. When  
128 these cells were tested using 40 control plasmas (all collected prior to the COVID-19  
129 pandemic), we failed to detect any specific reaction to the N, S\*\* or M proteins (**Fig. 1,**  
130 ***top row; supplemental figures S2-S5***).

131  
132 In contrast, plasmas from hospitalized, PCR-confirmed, COVID-19 patients (collected on  
133 day 0 of admittance into Johns Hopkins Hospital during April 2020) displayed a variety of  
134 reactivities towards the N, S\*\*, and M proteins. Of the 30 COVID-19 patient plasmas that  
135 were tested, 23 (~3/4) contained antibodies that bound to N-expressing cells, 20 (~2/3)  
136 contained antibodies that bound to S\*\*-expressing cells, and 13 (~1/2) scored positive for  
137 the presence of anti-M antibodies (**Fig. 1, rows 2-6; supplemental figures S6, S7**).  
138 Moreover, all plasmas with anti-M antibodies also contained anti-N and anti-S antibodies  
139 (**Table 1**). These results establish the validity of microscopy-based serology testing,  
140 indicate that the levels of anti-M antibodies may be a more reliable indicator of a deep  
141 and broad antibody responses to SARS-CoV-2 infection, and are generally consistent  
142 with prior studies of COVID-19 patient antibody responses (Grzelak et al., 2020; Whitman  
143 et al., 2020),

144  
145 ***Patient antibodies reveal an antigenically distinct subpopulation of spike***



146 The SARS-CoV-2 spike protein is known to oscillate between multiple conformational  
147 states (Ke et al., 2020) and the anti-spike antibody responses of COVID-19 patients may  
148 allow us to detect functionally significant fluctuations in spike protein conformation within  
149 its native context of the human cell. Given that the 986KV987 to 986PP987 and  
150 682RRAR685 to 682GSAG685 substitutions present in the S\*\* protein are designed to  
151 limit such conformational fluctuations (Wrapp et al., 2020), we developed cell lines that  
152 express functional forms of spike. Htet1/S<sup>W1</sup> was engineered to express the spike protein  
153 encoded by the Wuhan-1 isolate of SARS-CoV-2 (Zhou et al., 2020) and was probed with  
154 plasmas with a small subset of COVID-19 patients (i.e. E12, E9, 5, and G4). Some of  
155 these plasmas (plasmas E12 and E9) generated an antibody staining pattern against the  
156 S<sup>W1</sup> protein that conformed to the expected distribution, namely strong staining at the  
157 plasma membrane and in some cells in the Golgi, shown here by the occasional co-  
158 localization with GM130 (**Fig. 3, left column**). However, staining with other plasmas (5,  
159 G4) allowed the detection of yet another subpopulation of spike proteins within large, non-  
160 Golgi, intracellular structures.

161

162 These results indicate that spike expression in human cells leads to the creation of  
163 antigenically distinct subpopulations of spike that display different subcellular  
164 distributions, and furthermore, that COVID-19 patients vary significantly in their  
165 development of antibodies to these different conformations. In light of these findings, we  
166 tested whether plasma antibodies might shed light on the effects of the spike D614G  
167 mutation, which is known to enhance viral fitness through an increase in SARS-CoV-2  
168 infectivity and transmission (Hou et al., 2020; Korber et al., 2020; Lorenzo-Redondo et

169 al., 2020). Towards this end, we generated the Htet1/S<sup>D614G</sup> cell line and interrogated  
170 S<sup>D614G</sup>-expressing cells using the same four plasmas (**Fig. 3, right column**). Although  
171 this form of spike differs from S<sup>W1</sup> by just a single amino acid, all four plasmas revealed  
172 enhanced staining of spike in these large, non-Golgi intracellular compartments, raising  
173 the possibility that the D614G mutation either enhances the trafficking of spike to these  
174 compartments or enhances a conformational shift that allows its detection by the  
175 antibodies in these plasmas.

176

### 177 ***SARS-CoV-2 spike is trafficked to lysosomes***

178 Given the central role of spike in SARS-CoV-2 biology, the pronounced impact of the  
179 D614G mutation on the COVID-19 pandemic, and the fact that all leading vaccine  
180 candidates are based solely on spike, we sought to determine the identity of these large,  
181 spike-containing structures. This was done by inducing Htet1/S<sup>D614G</sup> cells to express  
182 spike and then processing the cells for immunofluorescence microscopy using plasma  
183 G4 and antibodies directed against marker proteins of various subcellular compartments.  
184 These experiments showed no labeling of these structures with markers of the ER  
185 (calnexin and BiP), the ERGIC (ERGIC53 and ERGIC3,) the Golgi (GM130), endosomes  
186 (EEA1) or the plasma membrane (CD810 (**supplemental figure S8**)). However, these  
187 structures did label with antibodies specific for lysosomal membrane markers Lamp1 and  
188 Lamp2 (**Fig. 3A, B**) and the lysosome-associated proteins Lamp3 (CD63) and mTOR  
189 (**Fig. 3C, D**). It has recently been shown that MHV-infected cells mislocalize the KDEL  
190 receptor (KDELR) from the ER and Golgi to the lysosome as part of virus-mediated  
191 reprogramming of host secretory pathways (Ghosh et al., 2020), and we observed that

192 spike expression induced a redistribution of the KDEL receptor to the lysosome in a  
193 portion of spike-expressing cells (**Fig. 3E**).

194

195 These experiments revealed that lysosomes of spike-expressing cells accumulated in  
196 large clusters, a phenotype that was relatively uncommon in non-expressing cells. This  
197 appearance is likely due to lysosome clustering rather than lysosome fusion, and to test  
198 this hypothesis we examined S<sup>D614G</sup> and Lamp2 distribution following a brief exposure to  
199 vacuolin-1, a PIKfyve inhibitor known to induce lysosome swelling (Huynh and Andrews,  
200 2005; Sano et al., 2016). As expected, cells treated with vacuolin-1 contained swollen  
201 lysosomes several micrometers in diameter (**Fig. 4A-C**). Importantly, the membranes of  
202 these swollen lysosomes were labeled for both S<sup>D614G</sup> and Lamp2, confirming that these  
203 proteins were indeed co-localized in lysosome membranes. Moreover, the sizes and  
204 numbers of these lysosomes appeared to be similar in expressing and non-expressing  
205 cells, indicating that spike expression induces lysosome clustering rather than lysosome  
206 fusion.

207

### 208 ***Spike expression disrupts lysosome function***

209 Lysosomes are the terminal destination for materials brought into the cell by fluid-phase  
210 endocytosis (Braulke and Bonifacino, 2009), a process that can be monitored by  
211 incubating cells with fluorescently-labeled, high molecular weight dextrans (Ohkuma,  
212 1989). To determine whether spike-containing lysosomes retained this core function of  
213 lysosomes, we incubated Htet1/S<sup>D614G</sup> cells with Alexa Fluor-647-labeled dextran (~10  
214 kDa), followed by a 3-hour chase in label-free media to allow endocytosed material to

215 reach the lysosome. Furthermore, we performed these experiments on cells that had only  
216 been induced to express spike for 20 hours rather than several days, to increase the  
217 probability that we visualize cells at an earlier stage of lysosome clustering when  
218 individual lysosomes could still be resolved. This presumption was borne out by the  
219 extensive co-localization of spike and Lamp2 in small lysosomes scattered throughout  
220 the cytoplasm of control Htet1/S<sup>D614G</sup> cells (**Fig. 4D**). As for whether spike-containing  
221 lysosomes were able to accumulate A647-dextran uptake similarly to other lysosomes in  
222 the cell, or in other cells, we observed that spike-containing lysosomes displayed little if  
223 any A647-dextran fluorescence, even in cells that contained many spike-negative, A647-  
224 dextran-positive lysosomes (**Fig. 4E, F**). Interestingly, both populations of lysosomes  
225 within these cells (spike+, A647- and spike-, A647+) appeared to cluster together in cells  
226 that had larger lysosome clusters.

227

228 Lysosome acidification is another hallmark of lysosome function, and is catalyzed by the  
229 vacuolar ATPase (V-ATPase) proton pump (Futai et al., 2019). A number of probes have  
230 been developed that label acidic compartments (Chazotte, 2011), including the  
231 lysotracker series of probes. To determine whether spike-containing lysosomes have a  
232 pH similar to spike-negative lysosomes, we labeled Htet1/S<sup>D614G</sup> cells with LysoTracker  
233 Deep Red and then processed the cells for immunofluorescence microscopy using  
234 plasma G4 to detect the lysosomal forms of spike. LysoTracker Deep Red labeled many  
235 lysosomes brightly, and while some spike-containing lysosomes displayed labeling  
236 consistent with an acidic lumen, many of the spike-containing lysosomes displayed  
237 relatively low or no lysotracker fluorescences (**Fig. 4G**).

238

239 ***Spike trafficking to lysosomes is resistant to inhibitors of endocytosis,***  
240 ***microtubules, and secretion but sensitive to V-ATPase inhibition***

241 Proteins can be trafficked to lysosomes following endocytosis from the plasma membrane  
242 by a pathway that often effects their destruction, or by direct intracellular vesicle traffic  
243 (Braulke and Bonifacino, 2009). To determine whether the lysosomal trafficking of spike  
244 occurs via the endocytic pathway so often associated with cargo protein destruction, we  
245 incubated Htet1/S<sup>D614G</sup> cells with doxycycline for 14 hours in the presence of vehicle alone  
246 (DMSO) or in media containing either of two inhibitors of endocytosis, the dynamin-1  
247 inhibitor dynasore, which blocks clathrin-dependent endocytosis (Kirchhausen et al.,  
248 2008), or the clathrin inhibitor pitstop2, which blocks both clathrin-dependent and clathrin-  
249 independent endocytosis (Dutta et al., 2012). Htet1/S<sup>D614G</sup> cells incubated with vehicle  
250 alone (DMSO) localized spike to Lamp2-positive lysosomes (**Fig. 5A**) and the same was  
251 observed for Htet1/S<sup>D614G</sup> cells incubated with either dynasore or pitstop2 (**Fig. 5B, C**).

252

253 The microtubule-inhibitor nocodazole, while not a general inhibitor of endocytosis, has  
254 been shown to impair the lysosomal uptake of selected endocytosed proteins (Tacheva-  
255 Grigorova et al., 2013). Moreover, it is known to affect lysosome function by blocking  
256 microtubule-dependent retrograde and anterograde movements of lysosomes  
257 (Cabukusta and Neefjes, 2018). Addition of nocodazole had no discernable effect on the  
258 lysosomal sorting of spike (**Fig. 5D**) and while it had some effect on lysosome distribution,  
259 it did not prevent spike-induced lysosome clustering. Lysosome function is more severely  
260 inhibited by bafilomycin A1, a potent inhibitor of the V-ATPase that blocks acidification of

261 lysosomes (and other organelles), prevents the maturation of many lysosomal  
262 hydrolases, and inhibits the activity of many pH-dependent lysosomal enzymes. and  
263 required for lysosome acidification (Braulke and Bonifacino, 2009; Futai et al., 2019). To  
264 explore its effects on the lysosomal sorting of spike, cells were incubated with bafilomycin  
265 throughout the period of spike induction and then processed for immunofluorescence  
266 microscopy. Bafilomycin-treated cells localized spike to Golgi and plasma membranes  
267 rather than lysosomes (**Fig. 5F-I**), demonstrating that the trafficking of spike to lysosomes  
268 is a V-ATPase-dependent process. Interestingly, the lysosomes of bafilomycin-treated  
269 cells showed little if any clustering.

270

### 271 ***The D614G mutation enhances the lysosomal sorting of spike***

272 Given that the D614G mutation has a significant impact on SARS-CoV-2 infectivity and  
273 transmission, we asked whether this mutation might impact the lysosomal sorting of spike.  
274 Htet1/S<sup>W1</sup> and Htet1/S<sup>D614G</sup> cells express spike in response to doxycycline, and at similar  
275 levels (**Fig. 6A**). Significant amounts of spike are proteolytically processed at its  
276 682RRAR685 motif to generate the S2 and S1 fragments, and these cells also contained  
277 similar levels of both S2 and S1. However, the D614G mutation did induce a slight shift  
278 in the relative extent of processing at the S1/S2 boundary, shown here by somewhat less  
279 full-length spike in Htet1/S<sup>D614G</sup> cells relative to Htet1/S<sup>W1</sup> cells.

280

281 To determine the subcellular distribution of the D614 and G614 forms of spike,  
282 doxycycline-induced Htet1/S<sup>W1</sup> and Htet1/S<sup>D614G</sup> cells were processed for  
283 immunofluorescence microscopy using an antibody that binds the C-terminal 14 amino

284 acids of spike (-DSEPVLKGVKLHYT<sub>COOH</sub>), a region of the protein that is shielded by a  
285 lipid bilayer from the D614G mutation and the conformational changes it might induce.  
286 Although both forms of spike displayed significant co-localization with the lysosomal  
287 marker Lamp2, the D614G mutation appeared to induce a shift in spike protein sorting  
288 towards the lysosome (**Fig. 6B, C**). Although the relative amounts of lysosome-localized  
289 spike varied significantly from one cell to another in both cell populations, digital image  
290 analysis quantified the effect of the D614G mutation as 54% increase in its lysosomal  
291 staining ( $p = 0.00000024$ ; Student's *t*-test; 2-tailed; two-sample, unequal variance), from  
292 an average of 817 +/- 44 (standard error of the mean (s.e.m.)) in Htet1/S<sup>W1</sup> cells (n = 34  
293 images) to an average of 1265 +/- 64 (s.e.m) in Htet1/S<sup>D614G</sup> cells (n = 37 images) (**Fig.**  
294 **6D**).

295  
296 These results suggest a model of SARS-CoV-2 biogenesis in which the D614G mutation  
297 enhances spike protein trafficking to the lysosome. Given the recent report that the  
298 biogenesis of newly-synthesized MHV particles occurs via lysosomes and that MHV-  
299 infected cells accumulate MHV particles in lysosomes (Ghosh et al., 2020), we tested  
300 whether the D614G mutation might promote the lysosomal accumulation of spike and  
301 spike-containing vesicles in SARS-CoV-2-infected cells. More specifically, we infected  
302 VeroE6TMPRSS2 cells with equal m.o.i. of a G614 strain of SARS-CoV-2 (HP7) or a  
303 D614 strain of SARS-CoV-2 (HP76). 18 hours after initiation of infection, the two cell  
304 populations were fixed, permeabilized, and processed for confocal immunofluorescence  
305 microscopy using antibodies specific for spike and Lamp2 (**Fig. 7**). In cells infected with  
306 the G614 virus, spike was localized primarily to small intracellular vesicles clustered in

307 the perinuclear area of the cell, proximal to Lamp2-positive structures, often co-localizing  
308 with Lamp2, and especially in small, virus-sized punctae surrounded by Lamp2-positive  
309 membrane (**Fig. 7A-D**). In contrast, spike distribution in D614 virus-infected cells was  
310 distributed across a much broader array of intracellular compartments, especially the  
311 plasma membrane and intracellular compartments distant from Lamp2-positive structures  
312 (**Fig. 7E-H**). However, these differences were a matter of degree, as D614 spike also  
313 displayed some labeling in Lamp2-positive and nearby compartments, as well as in small  
314 spike-positive puncta surrounded by Lamp2-containing membrane.

315



## 316 **Discussion**

317 We show here that the spike D614G mutation alters spike protein sorting, enhancing its  
318 trafficking towards the lysosome and away from other intracellular compartments. This  
319 D614G-induced shift in spike protein trafficking was observed in human cells expressing  
320 the spike protein on its own, outside the context of a viral infection, where it appeared to  
321 enhance spike-induced lysosomes clustering. It was also observed in the context of  
322 SARS-CoV-2-infected cells, as spike protein encoded by G614 virus displayed increased  
323 association with lysosomes and reduced accumulation in non-lysosomal compartments  
324 and areas of the cell. Furthermore, we observed that cells infected by a G614 strain of  
325 SARS-CoV-2 exhibited an enhanced accumulation of discrete, small, spike-containing  
326 punctae within Lamp2-positive membranes. In addition, we observed that the D614G  
327 mutation induced a slight elevation in spike protein processing at the S1/S2 junction. To  
328 the best of our knowledge, the D614G-induced lysosomal shift in spike protein trafficking  
329 and slight elevation in spike processing represent the earliest cell biological and  
330 biochemical manifestations of the D614G mutation, raising the strong possibility that they  
331 may contribute to the pronounced effects of the D614G mutation on SARS-CoV-2  
332 infectivity, viral load, and transmission (Hou et al., 2020; Korber et al., 2020; Lorenzo-  
333 Redondo et al., 2020).

334

335 Numerous lines of evidence support our conclusion that spike is trafficked to the lysosome  
336 membrane, including its co-localization with Lamp1, Lamp2, and Lamp3/CD63, its ring-  
337 like staining in vacuolin-1-treated cells, its induction of lysosome clustering, and its  
338 lysosomal localization when detected with a relatively conformation-independent antibody

339 probe (the affinity purified antibodies to its C-terminal 14 amino acids. As for how spike is  
340 trafficked to lysosomes, our data indicate that it can occur independently of endocytosis,  
341 as it's lysosomal accumulation was not blocked by inhibitors of clathrin-dependent or  
342 clathrin-independent endocytosis. Spike trafficking to lysosomes was also unaffected by  
343 the microtubule depolymerizing agent nocodazole, even though nocodazole ablates  
344 motor-directed lysosome movements. Spike trafficking to lysosomes was, however,  
345 strongly inhibited by bafilomycin A1, a V-ATPase inhibitor, indicating that compartment  
346 acidification is critical to the lysosomal trafficking of spike. These results are consistent  
347 with those from a recent CRISPR-based screen for genes required for SARS-CoV-2  
348 replication, which identified 13 components of the V-ATPase among the 50-most  
349 important genes for SARS-CoV-2 replication (Daniloski et al., 2020).

350

351 In addition to being trafficked to lysosomes, the expression of spike appears to alter  
352 lysosome function. This was apparent from the fact that spike expression induces a  
353 pronounced clustering of lysosomes, especially in cells expressing the G614 form of spike  
354 (**Table 2**). While we do not know the molecular mechanism by which spike expression  
355 drives lysosome clustering, it appeared to be a microtubule-independent process, as it  
356 was not inhibited by nocodazole, similar to previous studies of lysosome clustering (Ba et  
357 al., 2018). Spike-induced alteration of lysosome function was also apparent from was the  
358 fluorescent dextran uptake experiments, which revealed that spike-containing lysosomes  
359 were defective in uptake of this fluid-phase endocytosis marker, and may also display a  
360 somewhat reduced ability to acidify their lumen, as some spike-containing lysosomes  
361 displayed low labeling with LysoTracker Deep Red.

362

363 Given that the D614G mutation enhances viral fitness, it is important to consider how viral  
364 fitness might be promoted by an increase in the lysosomal sorting of spike and the  
365 accumulation of spike-containing punctae within lysosomes of SARS-CoV-2-infected  
366 cells. The most obvious possibility is that these changes facilitate the lysosomal phases  
367 of SARS-CoV-2 virion biogenesis. This conclusion is based in part on the recent report  
368 by Ghosh et al that MHV is released independently of the biosynthetic secretory pathway,  
369 that MHV virions accumulate in lysosomes, that MHV release is an Arl8-dependent  
370 lysosomal secretory pathway, and that SARS-CoV-2 virions accumulate in a lysosome-  
371 like structure of SARS-CoV-2-infected cells (Ghosh et al., 2020). This model of  
372 coronavirus egress involves some degree of aberration to protein egress in general, as  
373 MHV infection induced the lysosomal trafficking of the KDEL receptor (Ghosh et al.,  
374 2020), a phenotype that we observed for spike-expressing cells.

375

376 An analysis of matched D614 and G614 SARS-CoV-2 virions revealed no difference in  
377 the ultrastructure of SARS-CoV-2 particles, the shape of spike trimers, or the amounts of  
378 S and S2 in viral particles (Hou et al., 2020), while Zhang et al. (doi:  
379 10.1101/2020.06.12.148726) concluded that the D614G mutation led to enhanced  
380 retention of S1. Our data show that cells expressing matched D614 and G614 forms of  
381 spike show no difference in the amounts of cell-associated S1 and S2, though there may  
382 be a slightly lower amount of full-length S. This may reflect a slight increase in the  
383 cleavage of G614 spike at the S1/S2 boundary, and since lysosomal proteases can  
384 catalyze this event it may be a consequence of enhanced lysosomal sorting of D614G

385 spike proteins. Alternatively, enhanced spike cleavage by Golgi proteases such as furin  
386 may potentiate the lysosomal sorting of spike.

387

388 The most obvious effect of the D614G mutation is the ~4-8-fold increase in a proxy marker  
389 of SARS-CoV-2 infection (an encoded luciferase) at 8 hours post-infection (Hou et al.,  
390 2020), suggestive of accelerated viral entry. Although it is at least formally possible that  
391 these various effect of the D614G mutation are unrelated, the more parsimonious  
392 hypothesis is that they are all reflections of a common mechanism. As for what this  
393 mechanism might be, there is already extensive precedent from the field of lysosomal  
394 protein sorting. Specifically, the mannose-6-phosphate (M6P)-M6P receptor system  
395 mediates the lysosomal delivery of both newly-synthesized intracellular cargoes and  
396 endocytosed cargoes retrieved from the extracellular milieu (Braulke and Bonifacino,  
397 2009). Although there is a report of M6P modification on spike glycans (Brun et al. 2020  
398 <https://www.biorxiv.org/content/10.1101/2020.11.16.384594v1.full.pdf>), we do not  
399 suggest that the effects of the D614G mutation are necessarily mediated by M6P  
400 receptors. Rather, we posit the more general hypothesis that spike protein interactions  
401 with one or more cell surface proteins accelerate SARS-CoV-2 entry and that the same  
402 or similar interactions facilitate the lysosomal trafficking of newly-synthesized spike  
403 proteins, perhaps by interactions with newly-synthesized versions of the same spike-  
404 binding proteins in the ER, ERGIC, or Golgi. In light of this hypothesis, it is interesting to  
405 note that SARS-CoV-2 infection is exquisitely sensitive to a known inhibitor of plasma  
406 membrane-to-lysosome traffic (Kang et al., 2020) and that SARS-CoV-2 infection requires  
407 numerous proteins involved in lysosome biology (Daniloski et al., 2020).

## 408 **Materials and Methods**

409

### 410 **Cell lines, cell culture, transfections**

411 HEK293 cells (ATCC) were cultured in complete medium (DMEM containing 10% fetal  
412 bovine serum and 1% penicillin/streptomycin solution (10,000 units/ml)). Transfections  
413 were carried out using lipofectamine according to the manufacturer's instructions. Htet1  
414 cells were generated by transfecting HEK293 cells with the plasmid pS147, which  
415 encodes the tetracycline-activated transcription factor rtTAv16 (Zhou et al., 2006),  
416 followed by selection of zeocin-resistant transgenic cell clones (200 ug/ml zeocin), and  
417 pooling of these clones. SARS-CoV-2 protein-expressing cell lines were generated by  
418 transfection of Htet1 cells with Sleeping Beauty transposons carrying a tet-regulated  
419 transgene designed to express each SARS-CoV-2 protein under control of the  
420 doxycycline-regulated TRE3G promoter. One to two days after transfection, cells were  
421 placed in selective media containing 1 ug/ml puromycin and 200 ug/ml zeocin. Multiple  
422 clones were obtained from each transfection, pooled, and expanded to create master  
423 banks of each test line. Expression of SARS-CoV-2 protein was induced by adding  
424 doxycycline to the culture medium at a final concentration of 1 ug/ml.

425

### 426 **Plasmids**

427 The plasmid pS147 is a CMV-based vector designed to express the rtTAv16 protein from  
428 a polycistronic ORF, upstream of a viral 2a peptide and the Bleomycin resistance coding  
429 region. Other vectors used in this study were based on a Sleeping Beauty transposon  
430 vector (pITRSB) in which genes of interest can be inserted between the left and right

431 inverted tandem repeats (ITRs). These include three plasmids in which the region  
432 between the ITRs contains (a) one gene in which a crippled EF1alpha promoter drives  
433 expression of a polycistronic ORF encoding mCherry, the p2a peptide, and the  
434 puromycin-resistance protein, and (b) a second gene in which the TRE3G promoter drives  
435 expression of codon-optimized forms of the N, S<sup>\*\*</sup>, or M proteins (pCG217, pCG218, and  
436 pCG221, respectively, which were used to create the Htet1/N, Htet1/S<sup>\*\*</sup>, and Htet1/M cell  
437 lines). Two additional transposon-mobilizing plasmids were also used in this study. These  
438 plasmids carry (a) one gene in which a crippled EF1alpha promoter drives expression of  
439 the puromycin-resistance protein, and (b) a second gene in which the TRE3G promoter  
440 drives expression of codon-optimized forms of the S<sup>W1</sup> or S<sup>D614G</sup> proteins (pCG145 and  
441 pCG200, respectively, used to create the Htet1/ S<sup>W1</sup> and Htet1/ S<sup>D614G</sup> cell lines). All  
442 plasmid sequences are available upon request. S<sup>\*\*</sup> encodes the same protein as S<sup>W1</sup>,  
443 with the exception of 6 amino acid changes (986KV987 to 986PP987 and 682RRAR685  
444 to 682GSAG685). S<sup>D614G</sup> encodes the same protein as S<sup>W1</sup>, with the exception of the  
445 D614G amino acid substitution.

446

#### 447 **Immunoblot**

448 HEK293 cell lines were grown in the presence or absence of doxycycline, lysed by  
449 addition of sample buffer, separated by SDS-PAGE, transferred to PVDF membranes,  
450 and incubated with primary antibodies and HRP-conjugated secondary antibodies.  
451 Following extensive washes, proteins were membranes visualized using  
452 chemiluminescence reagents and an Amersham Imager 600 gel imaging system.

453

454 **Immunofluorescence microscopy,**

455 Cells were cultured on either sterile, poly-L-lysine-coated coverglasses, or sterile, poly-L-  
456 lysine-coated, glass-bottom, black-walled 96 well plates. For serology testing, SARS-  
457 CoV-2 protein-expressing cells were mixed with the parental Htet1 cell line at a ratio of  
458 ~90%:10%. Cells were exposed to 1 ug/ml doxycycline for 1 day to induce SARS-CoV-2  
459 protein expression. Cells were then fixed (4% formaldehyde in PBS), permeabilized (1%  
460 Triton X-100 in PBS), and processed for immunofluorescence microscopy using  
461 established protocols. Coverglasses were mounted on slides using Fluoromount G  
462 (catalog #17984-25 , Electron Microscopy Sciences). Stained cells were visualized using  
463 an EVOSM7000 fluorescence microscope (ThermoFisher) equipped with 20x (PL FL 20X,  
464 0.50NA/2.5WD), 40x (PLAN S-APO 40X, NA0.95, 0.18MM), and 60x (OBJ PL APO 60X,  
465 1.42NA/0.15WD) Olympus objectives) Confocal fluorescence micrographs were acquired  
466 using a Zeiss LSM800 microscope with gallium-arsenide phosphide (GaAsP) detectors  
467 and a 100x/1.4na Plan-Apochromat objective. Images were assembled into figures using  
468 Adobe Illustrator. Quantitative analysis of image files was performed using ImageJ and  
469 proprietary software.

470

471 **Antibodies and other reagents**

472 Rabbit polyclonal antibodies were raised against synthetic peptides corresponding to  
473 carboxy-terminal peptides of SARS-CoV-2 N (-KQLQQSMSSADSTQA<sub>COOH</sub>) and S (-  
474 DSEPVLKGVKLHYT<sub>COOH</sub>). Rabbit antibodies to the SARS M protein carboxy-terminal  
475 peptide (-DHAGSNDNIALLVQ<sub>COOH</sub>) were a gift from C. Machamer, Johns Hopkins  
476 University. ThermoFisher was the source for rabbit antibodies directed against LAMTOR1

477 (#8975S), ERGIC3 (#16029-1-AP), ERGIC53 (#13364-1-AP), and calnexin (#PA5-  
478 34665) and for mouse monoclonal antibodies to EEA1 (#48453) and Lamp2 (MA1-205).  
479 Rabbit antibodies to mTOR were obtained from Cell Signaling (#2972S). Mouse  
480 monoclonal antibodies to GM130 (#610822) and CD81 (#555675) were obtained from  
481 BD. Mouse monoclonal antibody to Lamp3/CD63 (#NBP2-32830) was obtained from  
482 Novus. Mouse monoclonal antibody directed against CD9 (#312102) was obtained from  
483 BioLegend. Rabbit polyclonal antibodies to BiP/GRP78 (#21685) and mouse monoclonal  
484 to Lamp1 (#24170) were from Abcam. Fluorescently labeled secondary antibodies  
485 specific for human Igs (IgG, IgM, and IgA; pan Ig), human IgG, rabbit IgG, or mouse IgG  
486 were obtained from Jackson ImmunoResearch. LysoTracker Deep Red (#L12492) and  
487 Alexa647-Dextran 10,000 MW (#D22914) were obtained from ThermoFisher. We thank  
488 Dr. Nihal Altan-Bonnet for generous gift of the anti-BiP/GRP78 antibodies, the Lamp1  
489 monoclonal, and polyclonal antibody to the KDEL receptor.

490

#### 491 **Human Plasmas**

492 All patient plasmas were collected using standard procedures for blood draw and plasma  
493 collection. Following Johns Hopkins Medicine Institutional Review Board (IRB) approval,  
494 plasma samples were obtained under informed consent from healthy donors prior to the  
495 COVID-19 pandemic (JHM IRB NA\_0004638) as described (Cox et al., 2005). The  
496 COVID-19 specimens utilized for this publication were obtained from the Johns Hopkins  
497 Biospecimen Repository, which is based on the contribution of many patients, research  
498 teams, and clinicians, and were collected following IRB approval (Johns Hopkins COVID-  
499 19 Clinical Characterization Protocol for Severe Infectious Diseases (IRB00245545) and



500 Johns Hopkins COVID-19 Remnant Specimen Repository (IRB00248332)). All COVID-  
501 19 patient plasmas used in this study were collected on the day of admission of the patient  
502 into the Johns Hopkins Hospital, and between the dates of April 7 and April 22, 2020.

503

504

### 505 **Virus and virus infections**

506 VeroE6TMPRSS2 cells (Matsuyama et al., 2020) were used to grow and titrate infectious  
507 virus using established protocols (Klein et al., 2020; Schaecher et al., 2007). The clinical  
508 isolates SARS-CoV-2/USA/MD-HP00076/2020 (Spike D614; GenBank: MT509475.1)  
509 and SARS-Cov-2/USA/DC-HP00007/2020 (Spike G614; GenBank: MT509464.1) were  
510 isolated using published procedures (Gniazdowski et al., 2020) and virus stocks were  
511 grown on VeroE6TMPRSS2 cells. Virus stocks were sequenced to confirm that the amino  
512 acid sequence of the isolate was identical to the sequence derived from the clinical  
513 sample.

514 **Sources of Support:** Funding for this work was provided by Johns Hopkins University,  
515 by Capricor, and by grants from the National Institutes of Health (NIH) National Cancer  
516 Institute (UG3CA241687), the NIH Center of Excellence in Influenza Research and  
517 Surveillance (HHSN272201400007C), and the National Institute of Allergy and Infectious  
518 Diseases (U19A1088791).

519

520 **Disclosures:** S.J.G is a paid consultant for Capricor, holds equity in Capricor, and is co-  
521 inventor of intellectual property licensed by Capricor. S.J.T. is co-inventor of intellectual  
522 property licensed by Capricor. C.G. is co-inventor of intellectual property licensed by  
523 Capricor. N.A. is an employee of Capricor.

524

525 **Acknowledgments:** The authors thank Dr. Carolyn Machamer and Nihal Altan-Bonnet  
526 for their numerous insights and suggestions during the course of this work, as well as for  
527 their kind gift of antibodies. The authors acknowledge Dr. LaToya A. Roker (Johns  
528 Hopkins School of Medicine Microscope Facility) for excellent assistance with confocal  
529 image acquisition and processing, James Morrell for expert assistance with plasmid  
530 assembly, and Guido Massaccesi for assistance in plasma sample handling. We thank  
531 the National Institute of Infectious Diseases, Japan, for providing VeroE6TMPRSS2 cells.  
532 The specimens utilized for this publication were part of the Johns Hopkins Biospecimen  
533 Repository, which is based on the contribution of many patients, research teams, and  
534 clinicians.

535

536 **Figure Legends**

537

538 **Figure 1. Microscopy-based serology.** Fluorescence micrographs of (left two columns)  
539 Htet1/N, (middle two columns) Htet1/S\*\*, and (right two columns) Htet1/M cells that had  
540 been processed for immunofluorescence using human plasmas from (row 1) a control  
541 patient and (rows 2-6) 5 different COVID-19 patients. Bound antibodies were detected  
542 using Alexafluor 488-conjugated anti-human Ig antibodies, DAPI was used to stain the  
543 nucleus, and mCherry was expressed from the same transposon as the viral protein. The  
544 left column in each pair shows the merge of all three images while the right column of  
545 each pair shows the staining observed for the patient plasma antibodies. Bar, 75  $\mu\text{m}$ .

546

547 **Figure 2. Human plasmas reveal differential trafficking of antigenically distinct**  
548 **forms of spike.** Fluorescence micrographs of (left column) Htet1/S<sup>W1</sup> cells and (right  
549 column) Htet1/S<sup>D614G</sup> stained with (green) plasmas from COVID-19 patients E12, E9, 5,  
550 and G4, as well as with (red) antibodies specific for the Golgi marker GM130, and (blue)  
551 DAPI. White arrowheads point to large, spike-containing intracellular compartments that  
552 lack GM130. Insets (~2.5-fold higher magnification) show greater detail in areas of  
553 particular interest. Bar, 50  $\mu\text{m}$ .

554

555 **Figure 3. SARS-CoV-2 spike is trafficked to lysosomes.** Fluorescence micrographs of  
556 Htet1/S<sup>D614G</sup> cells induced with doxycycline and processed for immunofluorescence  
557 microscopy using (blue) DAPI, (green) plasma from COVID-19 patient G4, and (red)  
558 antibodies specific for for (A) Lamp1, (B) Lamp2, (C) Lamp3/CD63, (D) mTOR1, and (E)

559 KDEL receptor (KDEL-R). White arrowheads denote the positions of S<sup>D614G</sup>-containing  
560 lysosome-related compartments. Insets (~3-fold higher magnification) show greater detail  
561 in areas of particular interest. Bar, 50  $\mu$ m.

562

563 **Figure 5. Spike expression induces lysosome clustering and inhibits lysosome**

564 **function.** (A-C) Micrographs of Htet1/S<sup>D614G</sup> cells induced with doxycycline for two days

565 followed by treatment with (A) DMSO or (B, C) vacuolin-1 for 3 hours. Cells were stained

566 with (green) COVID-19 patient plasma G4, (red) a monoclonal anti-Lamp2 antibody, and

567 (blue) DAPI. (D-F) Micrographs of Htet1/S<sup>D614G</sup> cells induced with doxycycline for 20

568 hours (D) without treatment, (E) incubated with Alexa Fluor 647-dextran for an additional

569 3 hours in media containing doxycycline but lacking Alexa Fluor 647-dextran, or (F)

570 incubated for one hour in media containing both doxycycline and LysoTracker Deep Red.

571 Cells were stained with (green) COVID-19 patient plasma G4 and (red) a monoclonal

572 anti-Lamp2 antibody. Insets (~3-fold higher magnification) show greater detail in areas of

573 particular interest. Bar, 50  $\mu$ m.

574

575 **Figure 6. The D614G mutation enhances lysosomal sorting of spike.** (A) Immunoblot

576 analysis of doxycycline-treated Htet1, Htet1/S<sup>W1</sup>, and Htet1/S<sup>D614G</sup> cells. Cell lysates were

577 prepared and separated by SDS-PAGE, then processed for immunoblot using (left panel)

578 affinity purified antibodies specific for the C-terminal 14 amino acids of spike, (center

579 panel) a mouse monoclonal antibody specific directed against the S1 region of spike, and

580 (right panel) endogenously expressed Hsp90. (B, C) Fluorescence micrographs of

581 doxycycline-treated Htet1/S<sup>W1</sup> and Htet1/S<sup>D614G</sup> cells stained with (green) affinity purified

582 antibodies specific for the C-terminal 14 amino acids of spike, (red) a mouse monoclonal  
583 antibody specific for Lamp2, and (blue) DAPI. The upper panels (merge) display the  
584 composite of all three images, above the individual images for (green) spike and (red)  
585 Lamp2. Insets (~3-fold higher magnification) show greater detail in areas of particular  
586 interest. Bar, 50  $\mu\text{m}$ . (D) Plot of lysosome-associated levels of spike (relative mean  
587 fluorescence, arbitrary units) in cells expressing S<sup>W1</sup> or S<sup>D614G</sup>.

588

589 **Figure 7. G614 and D614 spike in SARS-CoV-2-infected cells.** Confocal fluorescence  
590 micrographs of Vero/TMPRSS2 cells infected with (A-D) a spike G614 strain of SARS-  
591 CoV-2 or (E-H) a spike D614 strain of SARS-CoV-2. Cells were infected with equal  
592 amounts of virus, incubated for 18 hours, then fixed, permeabilized, and stained with  
593 (green) affinity purified antibodies specific for the C-terminal 14 amino acids of spike, (red)  
594 a monoclonal anti-Lamp2 antibody, and (blue) DAPI. Insets (~3-fold higher magnification)  
595 show greater detail in areas of particular interest. Bar in original images, 10  $\mu\text{m}$ ; Bar in  
596 magnified insets, 2  $\mu\text{m}$ .

597

598 **Tables**

599 **Table 1. Microscopy-based serology assay results for 30 COVID-19 plasmas.**

| <b>Plasma</b>   | <b><math>\alpha</math>-N Ab</b> | <b><math>\alpha</math>-S Ab</b> | <b><math>\alpha</math>-M Ab</b> |
|-----------------|---------------------------------|---------------------------------|---------------------------------|
| <b>E5</b>       | positive                        | positive                        | negative                        |
| <b>E6</b>       | positive                        | positive                        | negative                        |
| <b>E7</b>       | positive                        | positive                        | negative                        |
| <b>E8</b>       | positive                        | positive                        | positive                        |
| <b>E9</b>       | positive                        | positive                        | positive                        |
| <b>E10</b>      | positive                        | positive                        | negative                        |
| <b>E11</b>      | positive                        | positive                        | positive                        |
| <b>E12</b>      | positive                        | positive                        | positive                        |
| <b>F1</b>       | positive                        | positive                        | positive                        |
| <b>F2</b>       | positive                        | positive                        | negative                        |
| <b>F3</b>       | positive                        | positive                        | positive                        |
| <b>F4</b>       | positive                        | positive                        | negative                        |
| <b>F5</b>       | negative                        | negative                        | negative                        |
| <b>F7</b>       | positive                        | positive                        | positive                        |
| <b>F8</b>       | negative                        | negative                        | negative                        |
| <b>F9</b>       | positive                        | negative                        | negative                        |
| <b>F10</b>      | negative                        | negative                        | negative                        |
| <b>F11</b>      | negative                        | negative                        | negative                        |
| <b>F12</b>      | positive                        | positive                        | positive                        |
| <b>G1</b>       | positive                        | positive                        | positive                        |
| <b>G2</b>       | positive                        | positive                        | positive                        |
| <b>G3</b>       | negative                        | negative                        | negative                        |
| <b>G4</b>       | positive                        | positive                        | negative                        |
| <b>G5</b>       | positive                        | negative                        | negative                        |
| <b>G6</b>       | negative                        | negative                        | negative                        |
| <b>G7</b>       | positive                        | negative                        | negative                        |
| <b>G8</b>       | negative                        | negative                        | negative                        |
| <b>G9</b>       | positive                        | positive                        | positive                        |
| <b>G10</b>      | positive                        | positive                        | positive                        |
| <b>plasma 5</b> | positive                        | positive                        | positive                        |

600

601

602

603 **Table 2. Percentage of cells with clustered (Lamp2+) lysosomes**

|                              | <b>Htet1/S<sup>D614G</sup></b> | <b>Htet1/S<sup>W1</sup></b> | <b>Htet1</b> |
|------------------------------|--------------------------------|-----------------------------|--------------|
| 604 <b>1-day doxycycline</b> | 33% (21/62)                    | 8% (8/101)                  | 3% (9/355)   |

605 **Legends to Supplemental Figures.**

606

607 ***Supplemental figure 1. Doxycycline-inducible expression of SARS-CoV-2 N, S\*\*, and M.*** Immunoblot of whole cell lysates of Htet1 cells, and of Htet1/N, Htet1/S\*\*, and  
608 ***and M.*** Immunoblot of whole cell lysates of Htet1 cells, and of Htet1/N, Htet1/S\*\*, and  
609 Htet1/M cells grown in the absence or presence of doxycycline. Blots were probed with  
610 (left panel) rabbit polyclonal anti-peptide antibodies specific for SARS-CoV-2 N protein,  
611 (center panel) rabbit polyclonal anti-peptide antibodies specific for SARS-CoV-2 S spike  
612 protein, and (right panel) rabbit polyclonal anti-peptide antibodies specific for the SARS  
613 and SARS-CoV-2 M protein. Size markers, from top: 250 kDa, 150 kDa, 100 kDa, 75 kDa,  
614 50 kDa, 37 kDa, 25 kDa, 20 kDa, 15 kDa, 10 kDa. Predicted molecular masses are 46  
615 kDa for N, 141 kDa for S\*\*, and 25 kDa for M. The high MW forms of M apparent in these  
616 blots were observed whenever M was expressed in isolation.

617

618 ***Supplemental figure 2. Control plasma staining data I.*** Fluorescence micrographs of  
619 doxycycline-induced Htet1/N, Htet1/S\*\*, and Htet1/M cells. Cells were processed for  
620 immunofluorescence microscopy and stained to detect (green) bound human plasma Ig  
621 and (blue) DAPI, then imaged to detect bound Ig, (red) mCherry, and DAPI. Micrographs  
622 present the merge of all three labels and are organized with cell lines in each column and  
623 plasmas in each row. These plasmas were collected prior to COVID-19 pandemic. Bar,  
624 75  $\mu\text{m}$ .

625

626 ***Supplemental figure 3. Control plasma staining data II.*** Fluorescence micrographs of  
627 doxycycline-induced Htet1/N, Htet1/S\*\*, and Htet1/M cells. Cells were processed for



628 immunofluorescence microscopy and stained to detect (green) bound human plasma Ig  
629 and (blue) DAPI, then imaged to detect bound Ig, (red) mCherry, and DAPI. Micrographs  
630 present the merge of all three labels and are organized with cell lines in each column and  
631 plasmas in each row. These plasmas were collected prior to COVID-19 pandemic. Bar,  
632 75  $\mu\text{m}$ .

633

634 **Supplemental figure 4. Control plasma staining data III.** Fluorescence micrographs of  
635 doxycycline-induced Htet1/N, Htet1/S\*\*, and Htet1/M cells. Cells were processed for  
636 immunofluorescence microscopy and stained to detect (green) bound human plasma Ig  
637 and (blue) DAPI, then imaged to detect bound Ig, (red) mCherry, and DAPI. Micrographs  
638 present the merge of all three labels and are organized with cell lines in each column and  
639 plasmas in each row. These plasmas were collected prior to COVID-19 pandemic. Bar,  
640 75  $\mu\text{m}$ .

641

642 **Supplemental figure 5. Control plasma staining data IV.** Three-color merged  
643 fluorescence micrographs of Htet1/N, Htet1/S\*\*, and Htet1/M cells imaged for (green)  
644 human plasma Ig staining, (red) mCherry expression and (blue) DAPI. Micrographs are  
645 organized with cell lines in each column, and plasmas in each row. These plasmas were  
646 collected prior to COVID-19 pandemic. Bar, 75  $\mu\text{m}$ .

647

648 **Supplemental figure 6. COVID-19 plasma staining data I.** Three-color merged  
649 fluorescence micrographs of Htet1/N, Htet1/S\*\*, and Htet1/M cells imaged for (green)  
650 bound human plasma Ig, (red) mCherry expression and (blue) DAPI. Micrographs are the

651 merge of all three images and are organized with cell lines in each column, and plasmas  
652 in each row. These plasmas were collected from COVID-19 patients on their first day of  
653 admittance into Johns Hopkins Hospital in April 2020. Bar, 75  $\mu\text{m}$ .

654

655 **Supplemental figure 7. COVID-19 plasma staining data II.** Three-color merged  
656 fluorescence micrographs of Htet1/N, Htet1/S\*\*, and Htet1/M cells imaged for (green)  
657 bound human plasma Ig, (red) mCherry expression and (blue) DAPI. Micrographs are the  
658 merge of all three images and are organized with cell lines in each column, and plasmas  
659 in each row. These plasmas were collected from COVID-19 patients on their first day of  
660 admittance into Johns Hopkins Hospital in April 2020. Bar, 75  $\mu\text{m}$ .

661

662 **Supplemental figure 8. ER, ERGIC, Golgi, endosome, and plasma membrane**  
663 **marker proteins are not enriched in large, spike-containing intracellular**  
664 **compartments.** Fluorescence micrographs of Htet1/S<sup>D614G</sup> cells induced with  
665 doxycycline and processed for immunofluorescence microscopy using (blue) DAPI,  
666 (green) plasma G4, and (red) antibodies specific for (A) calnexin, (B) BiP/GRP78, (C)  
667 ERGIC53, (D) ERGIC3, (E) GM130, (F) EEA1, and (G) CD81. Bar, 50  $\mu\text{m}$ .

668

669 **References**

- 670 Ba, Q., Raghavan, G., Kiselyov, K., and Yang, G. (2018). Whole-Cell Scale Dynamic  
671 Organization of Lysosomes Revealed by Spatial Statistical Analysis. *Cell Rep* 23, 3591-  
672 3606.
- 673 Braulke, T., and Bonifacino, J.S. (2009). Sorting of lysosomal proteins. *Biochim Biophys*  
674 *Acta* 1793, 605-614.
- 675 Cabukusta, B., and Neefjes, J. (2018). Mechanisms of lysosomal positioning and  
676 movement. *Traffic* 19, 761-769.
- 677 Cantuti-Castelvetri, L., Ojha, R., Pedro, L.D., Djannatian, M., Franz, J., Kuivanen, S., van  
678 der Meer, F., Kallio, K., Kaya, T., Anastasina, M., *et al.* (2020). Neuropilin-1 facilitates  
679 SARS-CoV-2 cell entry and infectivity. *Science*.
- 680 Chazotte, B. (2011). Labeling lysosomes in live cells with neutral red. *Cold Spring Harb*  
681 *Protoc* 2011, pdb prot5570.
- 682 Coronaviridae Study Group of the International Committee on Taxonomy of, V. (2020).  
683 The species Severe acute respiratory syndrome-related coronavirus: classifying 2019-  
684 nCoV and naming it SARS-CoV-2. *Nat Microbiol* 5, 536-544.
- 685 Cox, A.L., Netski, D.M., Mosbrugger, T., Sherman, S.G., Strathdee, S., Ompad, D., Vlahov,  
686 D., Chien, D., Shyamala, V., Ray, S.C., *et al.* (2005). Prospective evaluation of  
687 community-acquired acute-phase hepatitis C virus infection. *Clin Infect Dis* 40, 951-958.
- 688 Daly, J.L., Simonetti, B., Klein, K., Chen, K.E., Williamson, M.K., Anton-Plagaro, C.,  
689 Shoemark, D.K., Simon-Gracia, L., Bauer, M., Hollandi, R., *et al.* (2020). Neuropilin-1 is  
690 a host factor for SARS-CoV-2 infection. *Science*.

691 Daniloski, Z., Jordan, T.X., Wessels, H.H., Hoagland, D.A., Kasela, S., Legut, M.,  
692 Maniatis, S., Mimitou, E.P., Lu, L., Geller, E., *et al.* (2020). Identification of Required Host  
693 Factors for SARS-CoV-2 Infection in Human Cells. *Cell*.

694 Dutta, D., Williamson, C.D., Cole, N.B., and Donaldson, J.G. (2012). Pitstop 2 is a potent  
695 inhibitor of clathrin-independent endocytosis. *PLoS One* 7, e45799.

696 Futai, M., Sun-Wada, G.H., Wada, Y., Matsumoto, N., and Nakanishi-Matsui, M. (2019).  
697 Vacuolar-type ATPase: A proton pump to lysosomal trafficking. *Proc Jpn Acad Ser B Phys*  
698 *Biol Sci* 95, 261-277.

699 Ghosh, S., Dellibovi-Ragheb, T.A., Kerviel, A., Pak, E., Qiu, Q., Fisher, M., Takvorian,  
700 P.M., Bleck, C., Hsu, V.W., Fehr, A.R., *et al.* (2020). beta-Coronaviruses Use Lysosomes  
701 for Egress Instead of the Biosynthetic Secretory Pathway. *Cell*.

702 Gniazdowski, V., Morris, C.P., Wohl, S., Mehoke, T., Ramakrishnan, S., Thielen, P.,  
703 Powell, H., Smith, B., Armstrong, D.T., Herrera, M., *et al.* (2020). Repeat COVID-19  
704 Molecular Testing: Correlation of SARS-CoV-2 Culture with Molecular Assays and Cycle  
705 Thresholds. *Clin Infect Dis*.

706 Grzelak, L., Temmam, S., Planchais, C., Demeret, C., Tondeur, L., Huon, C., Guivel-  
707 Benhassine, F., Staropoli, I., Chazal, M., Dufloo, J., *et al.* (2020). A comparison of four  
708 serological assays for detecting anti-SARS-CoV-2 antibodies in human serum samples  
709 from different populations. *Sci Transl Med* 12.

710 Hoffmann, M., Kleine-Weber, H., and Pohlmann, S. (2020a). A Multibasic Cleavage Site  
711 in the Spike Protein of SARS-CoV-2 Is Essential for Infection of Human Lung Cells. *Mol*  
712 *Cell* 78, 779-784 e775.

713 Hoffmann, M., Kleine-Weber, H., Schroeder, S., Kruger, N., Herrler, T., Erichsen, S.,  
714 Schiergens, T.S., Herrler, G., Wu, N.H., Nitsche, A., *et al.* (2020b). SARS-CoV-2 Cell  
715 Entry Depends on ACE2 and TMPRSS2 and Is Blocked by a Clinically Proven Protease  
716 Inhibitor. *Cell* 181, 271-280 e278.

717 Hou, Y.J., Chiba, S., Halfmann, P., Ehre, C., Kuroda, M., Dinnon, K.H., 3rd, Leist, S.R.,  
718 Schafer, A., Nakajima, N., Takahashi, K., *et al.* (2020). SARS-CoV-2 D614G variant  
719 exhibits efficient replication *ex vivo* and transmission *in vivo*. *Science*.

720 Huynh, C., and Andrews, N.W. (2005). The small chemical vacuolin-1 alters the  
721 morphology of lysosomes without inhibiting Ca<sup>2+</sup>-regulated exocytosis. *EMBO Rep* 6,  
722 843-847.

723 Kang, Y.L., Chou, Y.Y., Rothlauf, P.W., Liu, Z., Soh, T.K., Cureton, D., Case, J.B., Chen,  
724 R.E., Diamond, M.S., Whelan, S.P.J., *et al.* (2020). Inhibition of PIKfyve kinase prevents  
725 infection by Zaire ebolavirus and SARS-CoV-2. *Proc Natl Acad Sci U S A* 117, 20803-  
726 20813.

727 Ke, Z., Oton, J., Qu, K., Cortese, M., Zila, V., McKeane, L., Nakane, T., Zivanov, J.,  
728 Neufeldt, C.J., Cerikan, B., *et al.* (2020). Structures and distributions of SARS-CoV-2  
729 spike proteins on intact virions. *Nature*.

730 Kirchhausen, T., Macia, E., and Pelish, H.E. (2008). Use of dynasore, the small molecule  
731 inhibitor of dynamin, in the regulation of endocytosis. *Methods Enzymol* 438, 77-93.

732 Klein, S.L., Pekosz, A., Park, H.S., Ursin, R.L., Shapiro, J.R., Benner, S.E., Littlefield, K.,  
733 Kumar, S., Naik, H.M., Betenbaugh, M.J., *et al.* (2020). Sex, age, and hospitalization drive  
734 antibody responses in a COVID-19 convalescent plasma donor population. *J Clin Invest*  
735 130, 6141-6150.

736 Korber, B., Fischer, W.M., Gnanakaran, S., Yoon, H., Theiler, J., Abfalterer, W.,  
737 Hengartner, N., Giorgi, E.E., Bhattacharya, T., Foley, B., *et al.* (2020). Tracking Changes  
738 in SARS-CoV-2 Spike: Evidence that D614G Increases Infectivity of the COVID-19 Virus.  
739 *Cell* 182, 812-827 e819.

740 Lorenzo-Redondo, R., Nam, H.H., Roberts, S.C., Simons, L.M., Jennings, L.J., Qi, C.,  
741 Achenbach, C.J., Hauser, A.R., Ison, M.G., Hultquist, J.F., *et al.* (2020). A Unique Clade  
742 of SARS-CoV-2 Viruses is Associated with Lower Viral Loads in Patient Upper Airways.  
743 medRxiv.

744 Matheson, N.J., and Lehner, P.J. (2020). How does SARS-CoV-2 cause COVID-19?  
745 *Science* 369, 510-511.

746 Matsuyama, S., Nao, N., Shirato, K., Kawase, M., Saito, S., Takayama, I., Nagata, N.,  
747 Sekizuka, T., Katoh, H., Kato, F., *et al.* (2020). Enhanced isolation of SARS-CoV-2 by  
748 TMPRSS2-expressing cells. *Proc Natl Acad Sci U S A* 117, 7001-7003.

749 Ohkuma, S. (1989). Use of fluorescein isothiocyanate-dextran to measure proton  
750 pumping in lysosomes and related organelles. *Methods Enzymol* 174, 131-154.

751 Poland, G.A., Ovsyannikova, I.G., and Kennedy, R.B. (2020). SARS-CoV-2 immunity:  
752 review and applications to phase 3 vaccine candidates. *Lancet*.

753 Ruch, T.R., and Machamer, C.E. (2012). The coronavirus E protein: assembly and  
754 beyond. *Viruses* 4, 363-382.

755 Sano, O., Kazetani, K., Funata, M., Fukuda, Y., Matsui, J., and Iwata, H. (2016). Vacuolin-  
756 1 inhibits autophagy by impairing lysosomal maturation via PIKfyve inhibition. *FEBS Lett*  
757 590, 1576-1585.

758 Schaecher, S.R., Mackenzie, J.M., and Pekosz, A. (2007). The ORF7b protein of severe  
759 acute respiratory syndrome coronavirus (SARS-CoV) is expressed in virus-infected cells  
760 and incorporated into SARS-CoV particles. *J Virol* 81, 718-731.

761 Tacheva-Grigorova, S.K., Santos, A.J., Boucrot, E., and Kirchhausen, T. (2013). Clathrin-  
762 mediated endocytosis persists during unperturbed mitosis. *Cell Rep* 4, 659-668.

763 Ujike, M., and Taguchi, F. (2015). Incorporation of spike and membrane glycoproteins  
764 into coronavirus virions. *Viruses* 7, 1700-1725.

765 V'Kovski, P., Kratzel, A., Steiner, S., Stalder, H., and Thiel, V. (2020). Coronavirus biology  
766 and replication: implications for SARS-CoV-2. *Nat Rev Microbiol*.

767 Wang, Y., Grunewald, M., and Perlman, S. (2020). Coronaviruses: An Updated Overview  
768 of Their Replication and Pathogenesis. *Methods Mol Biol* 2203, 1-29.

769 Whitman, J.D., Hiatt, J., Mowery, C.T., Shy, B.R., Yu, R., Yamamoto, T.N., Rathore, U.,  
770 Goldgof, G.M., Whitty, C., Woo, J.M., *et al.* (2020). Evaluation of SARS-CoV-2 serology  
771 assays reveals a range of test performance. *Nat Biotechnol* 38, 1174-1183.

772 Wrapp, D., Wang, N., Corbett, K.S., Goldsmith, J.A., Hsieh, C.L., Abiona, O., Graham,  
773 B.S., and McLellan, J.S. (2020). Cryo-EM structure of the 2019-nCoV spike in the  
774 prefusion conformation. *Science* 367, 1260-1263.

775 Yao, H., Song, Y., Chen, Y., Wu, N., Xu, J., Sun, C., Zhang, J., Weng, T., Zhang, Z., Wu,  
776 Z., *et al.* (2020). Molecular Architecture of the SARS-CoV-2 Virus. *Cell* 183, 730-738  
777 e713.

778 Zhou, P., Yang, X.L., Wang, X.G., Hu, B., Zhang, L., Zhang, W., Si, H.R., Zhu, Y., Li, B.,  
779 Huang, C.L., *et al.* (2020). A pneumonia outbreak associated with a new coronavirus of  
780 probable bat origin. *Nature* 579, 270-273.

781 Zhou, X., Vink, M., Klaver, B., Berkhout, B., and Das, A.T. (2006). Optimization of the Tet-  
782 On system for regulated gene expression through viral evolution. *Gene Ther* 13, 1382-  
783 1390.  
784



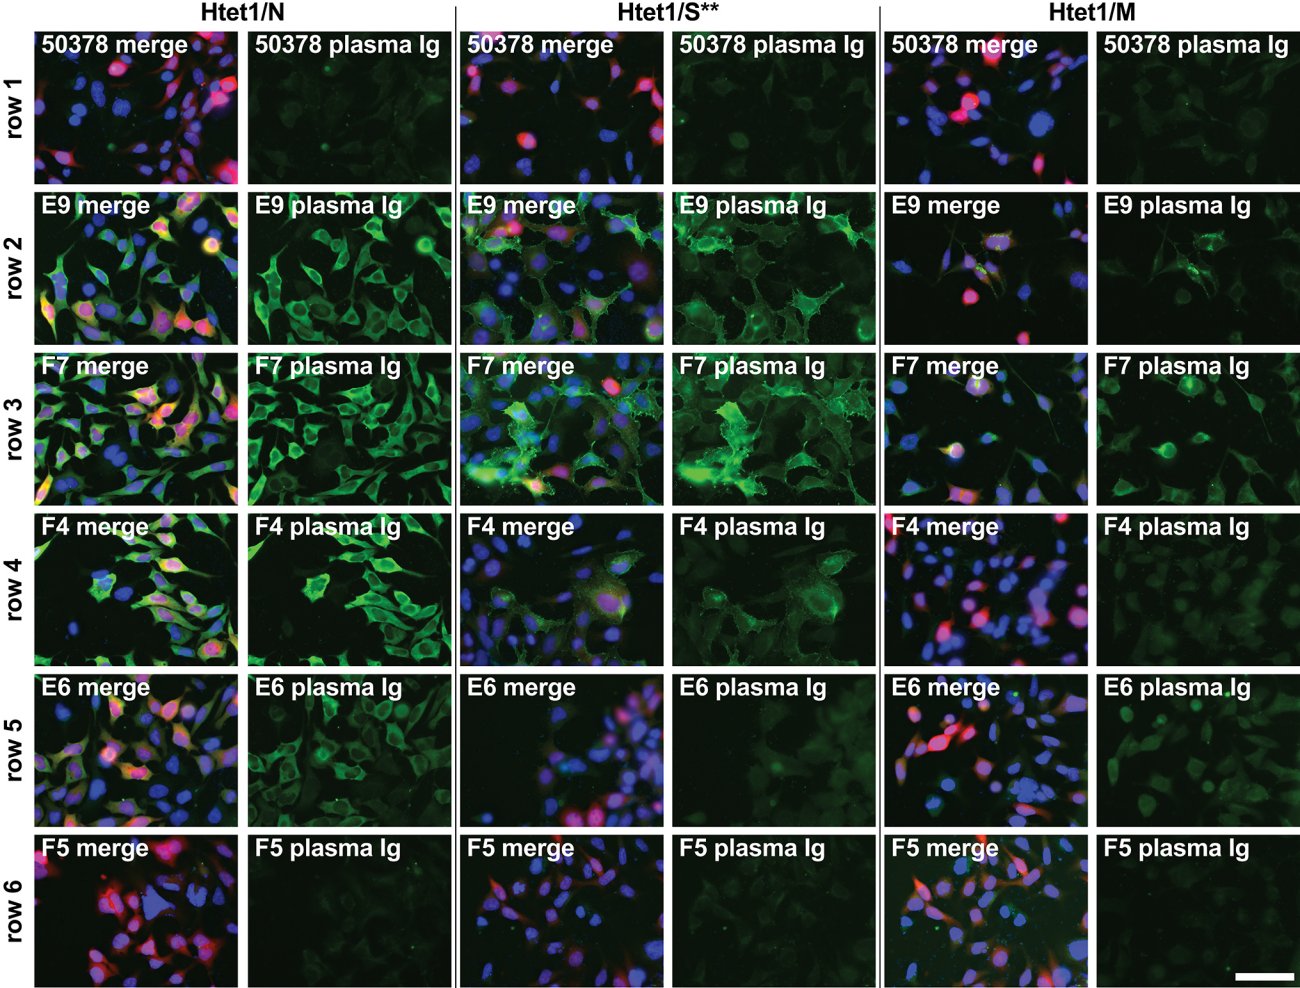

Figure 1

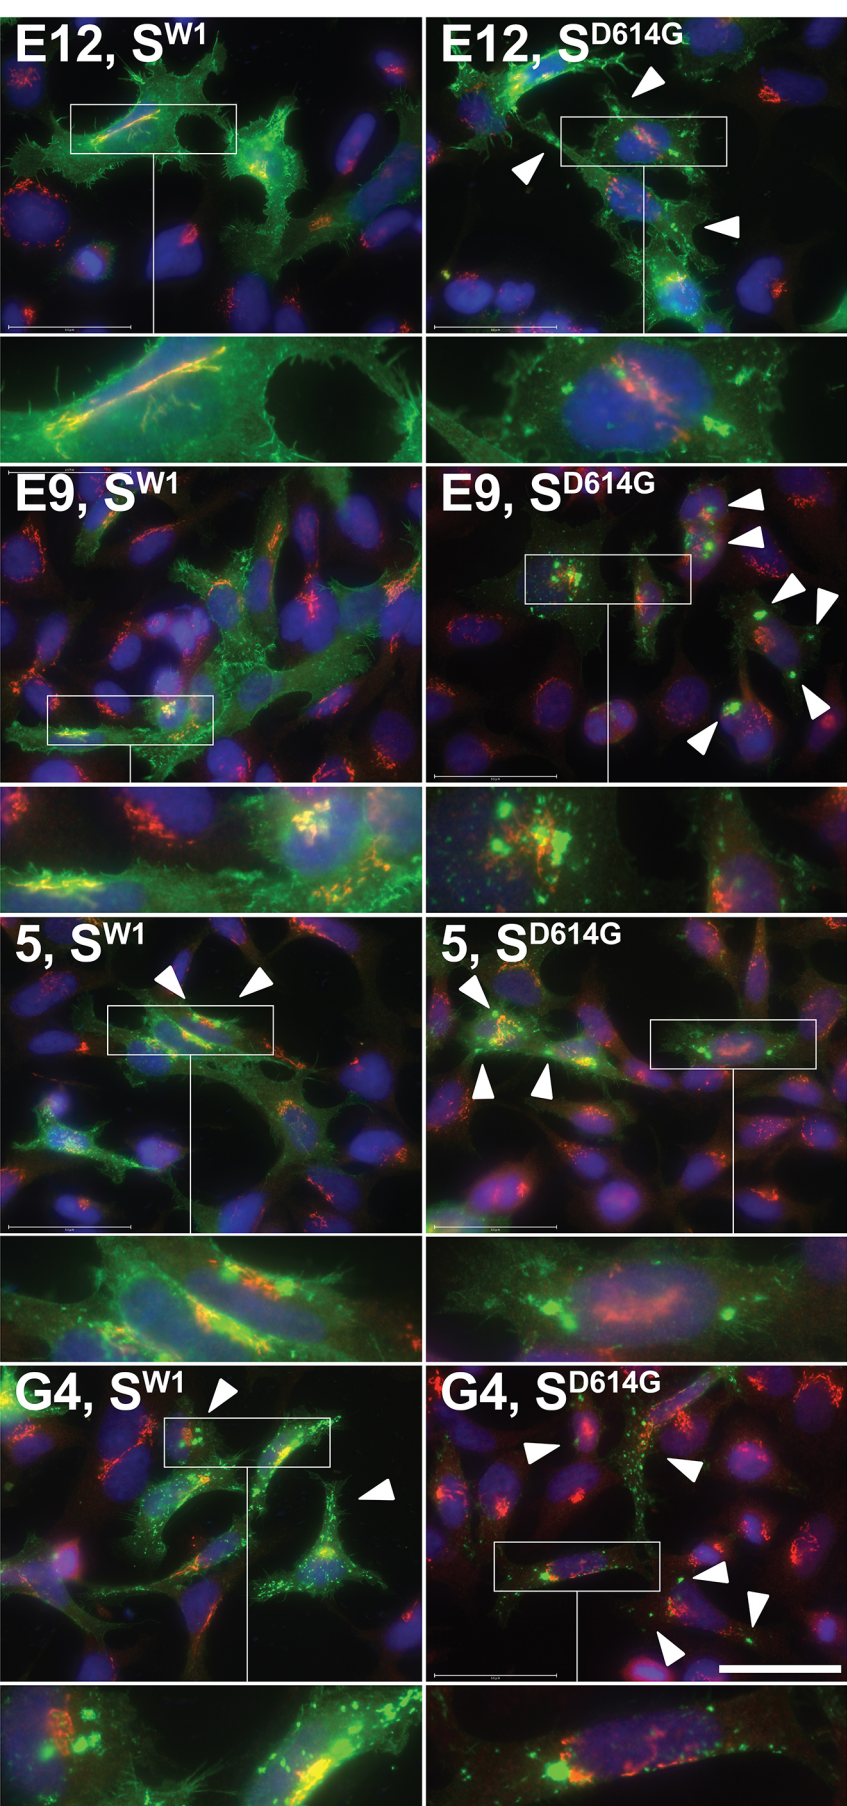

**Figure 2**

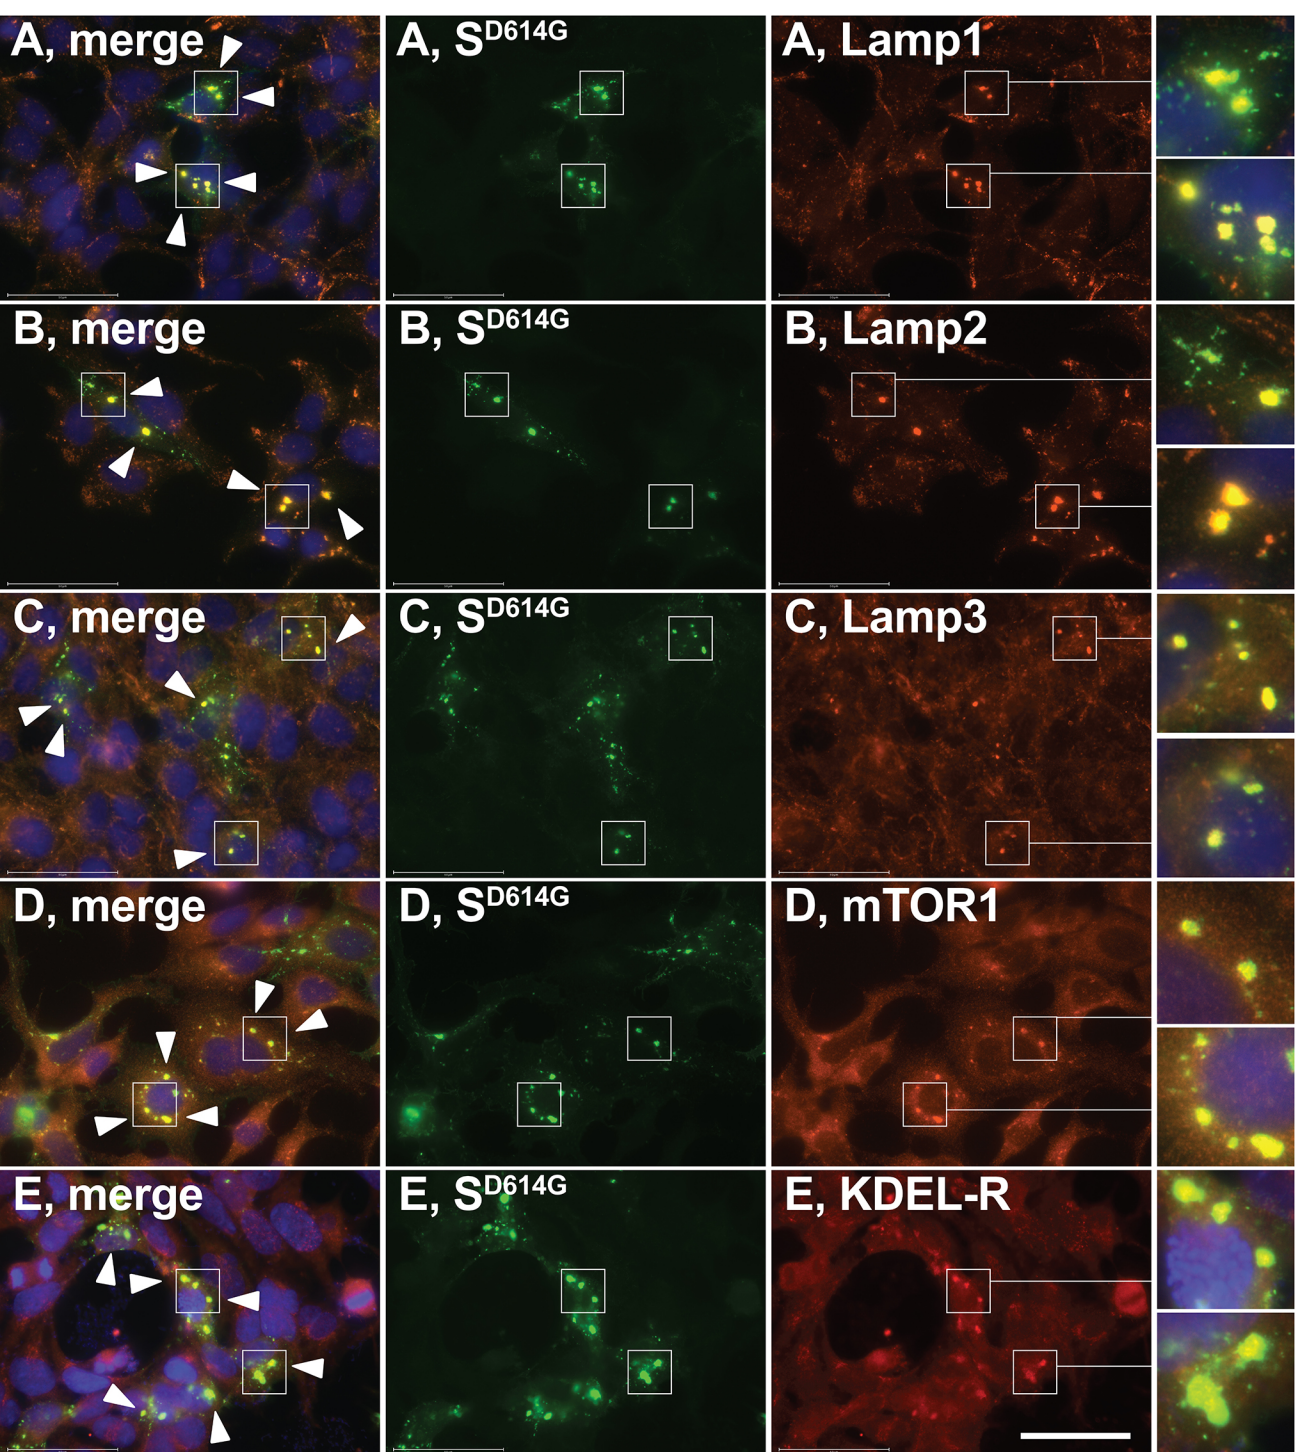

**Figure 3**

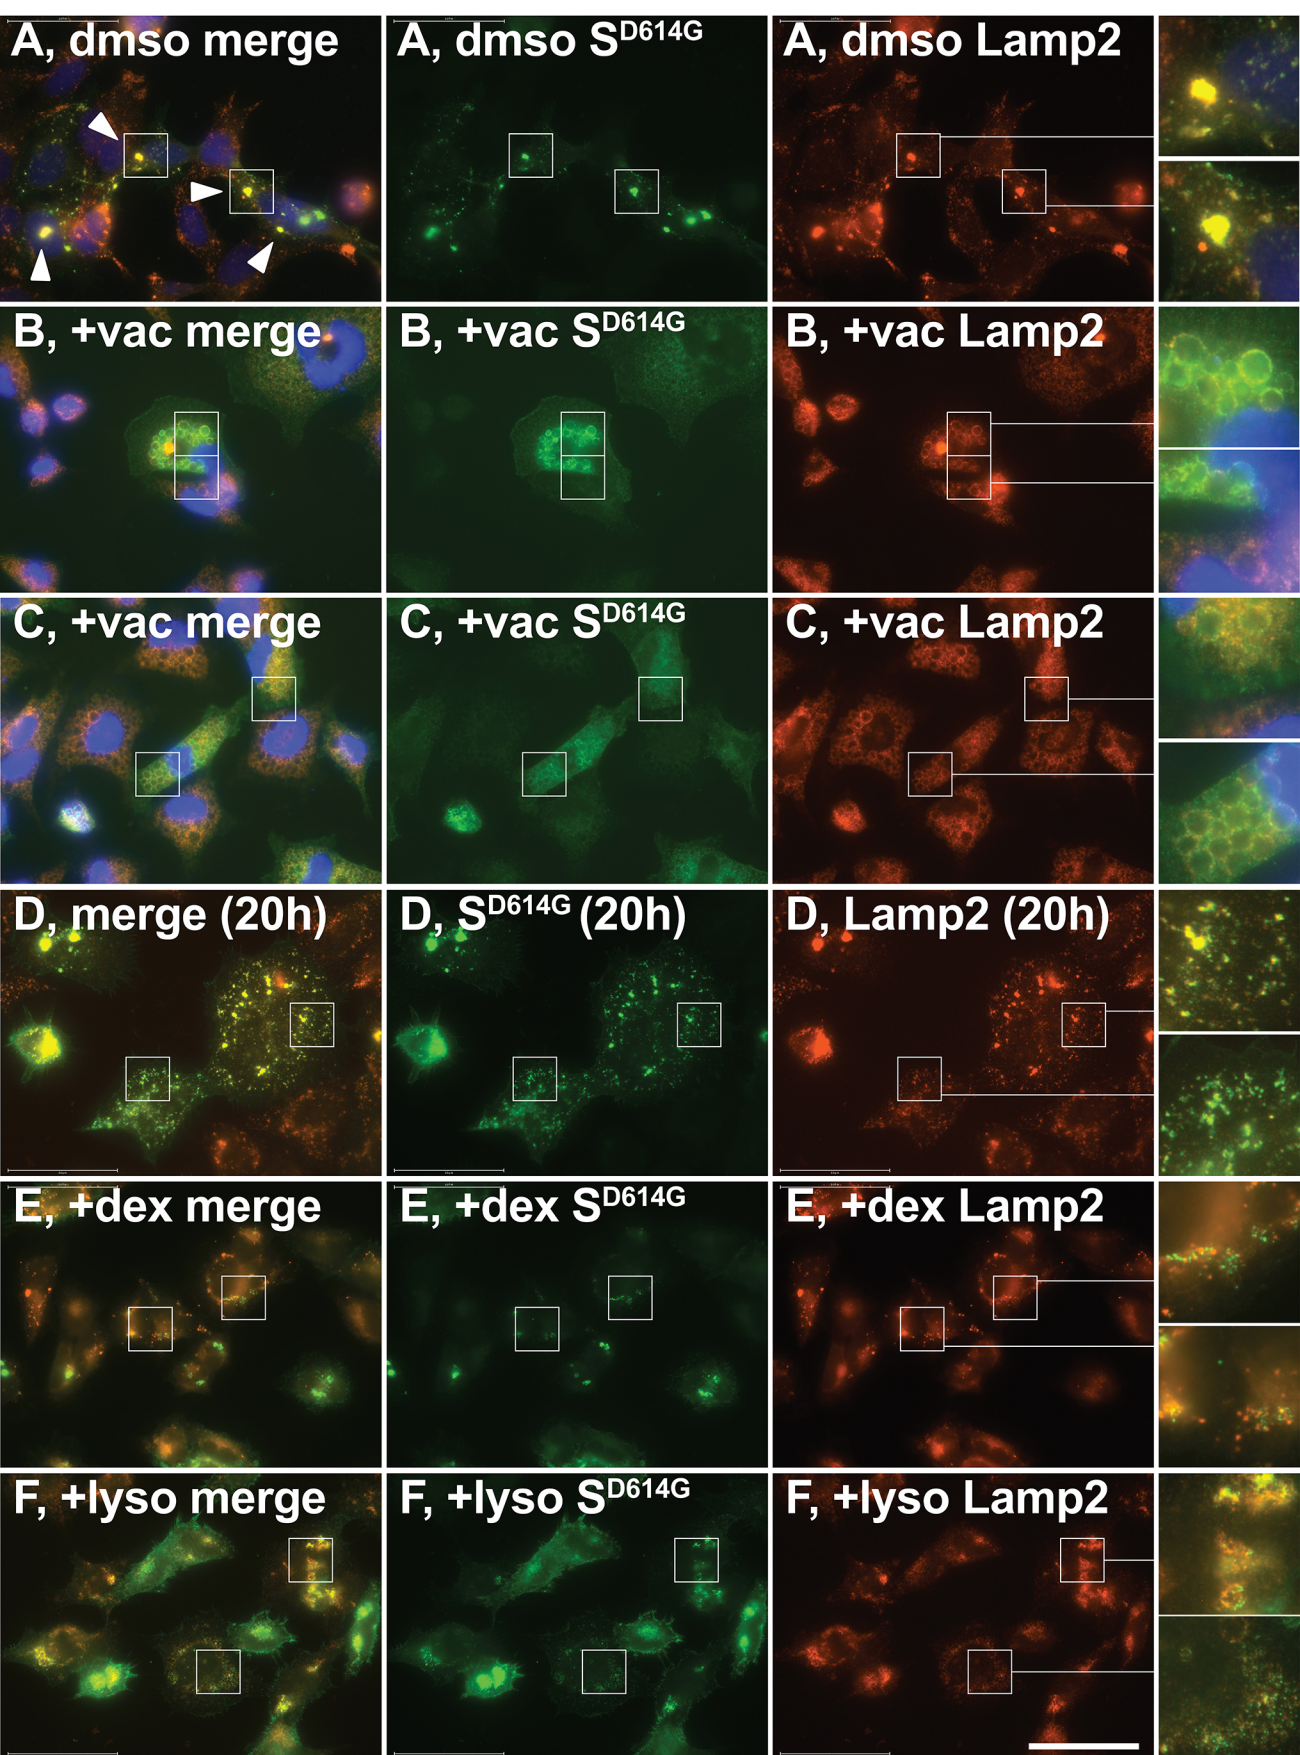

**Figure 4**

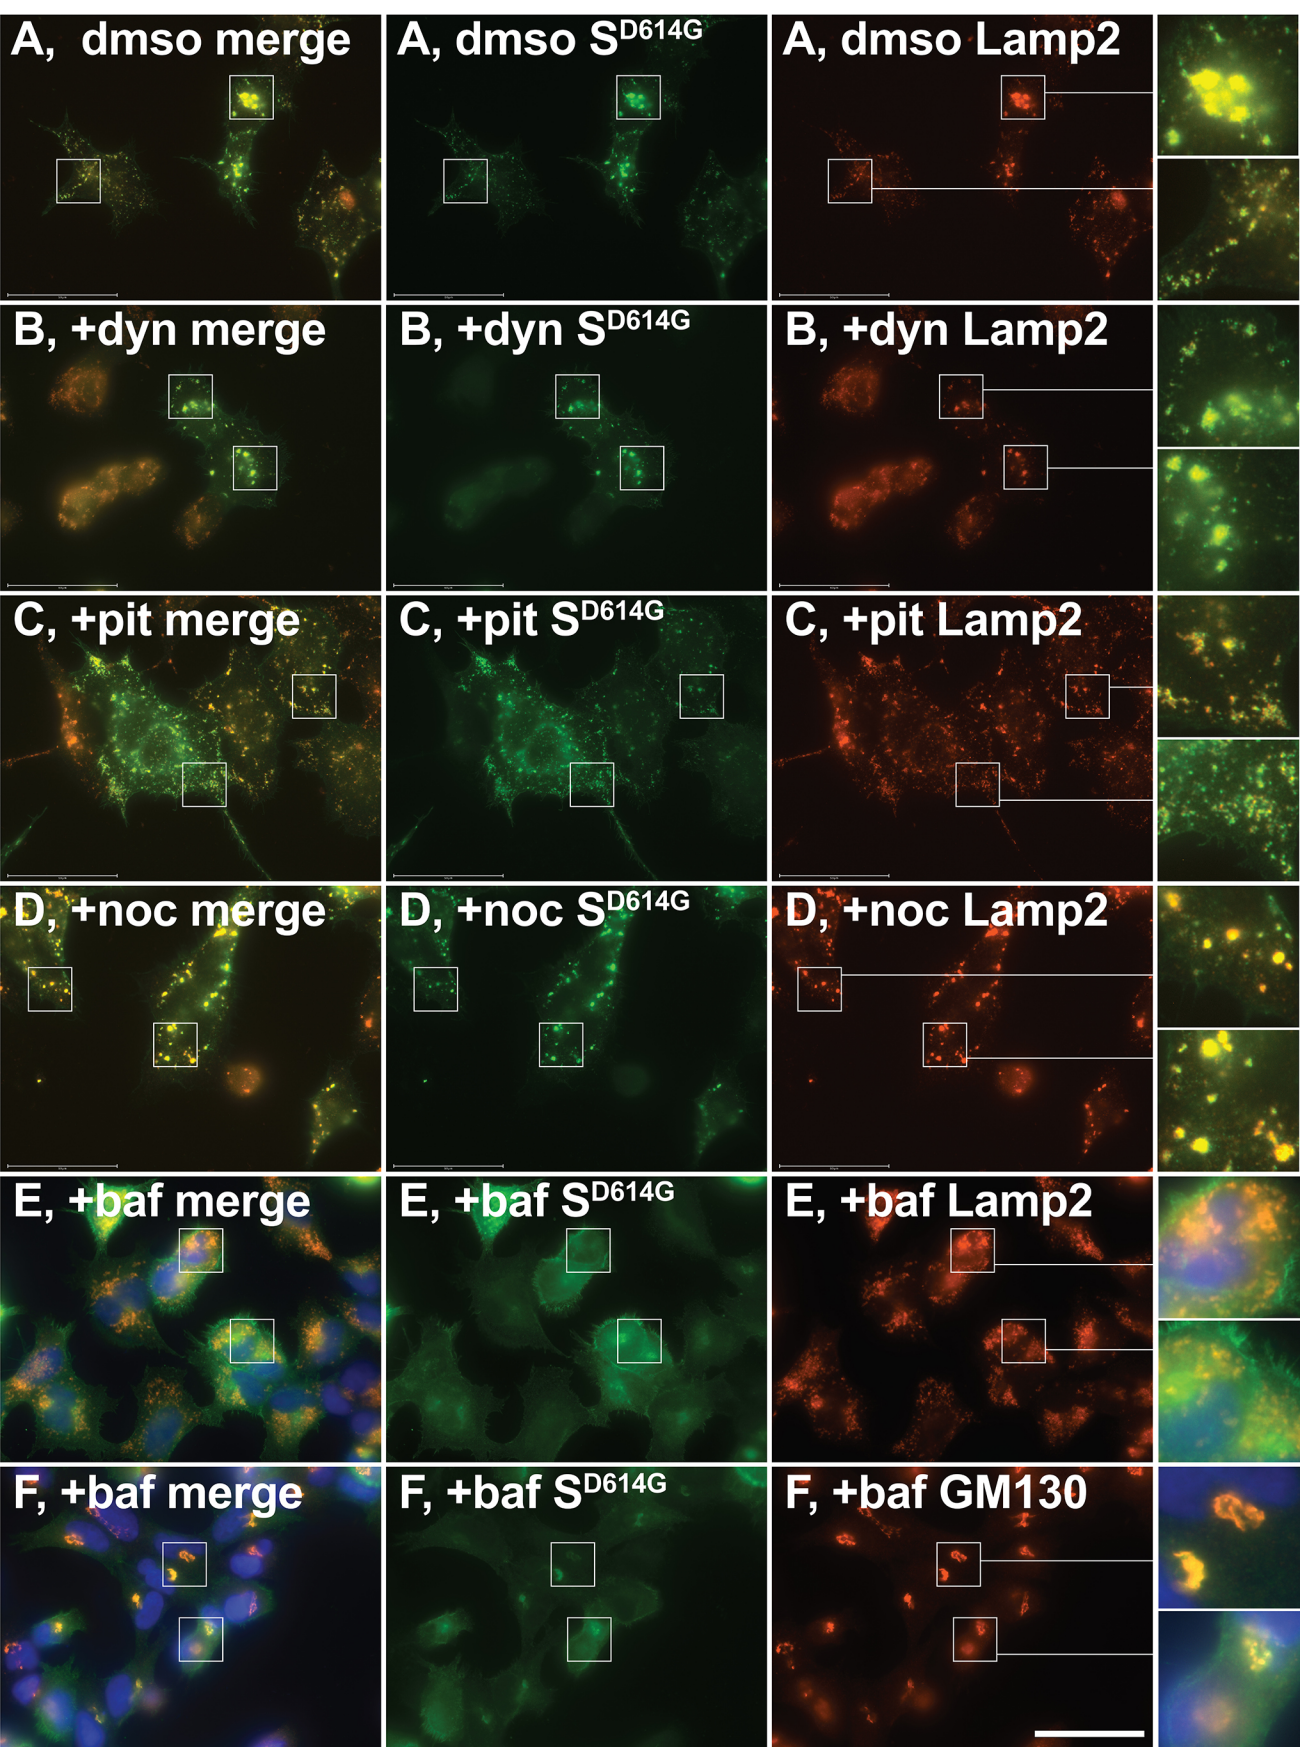

**Figure 5**

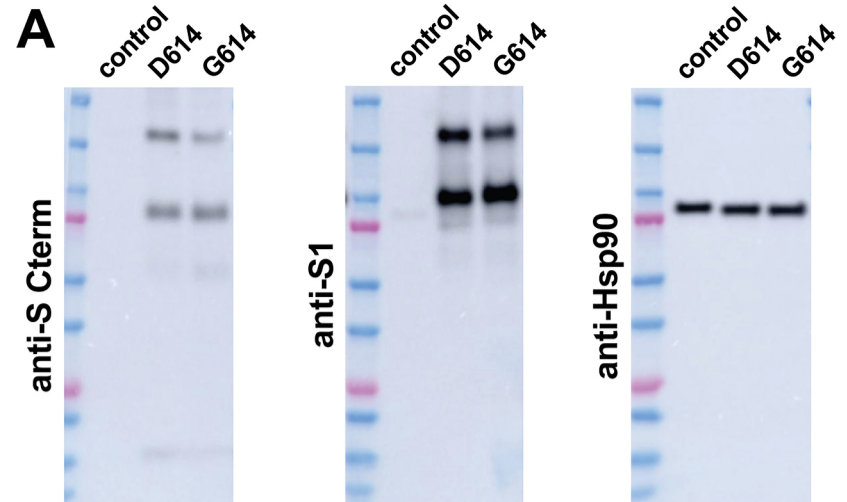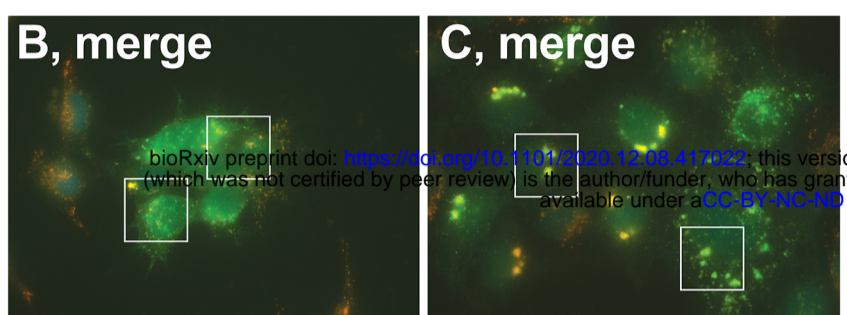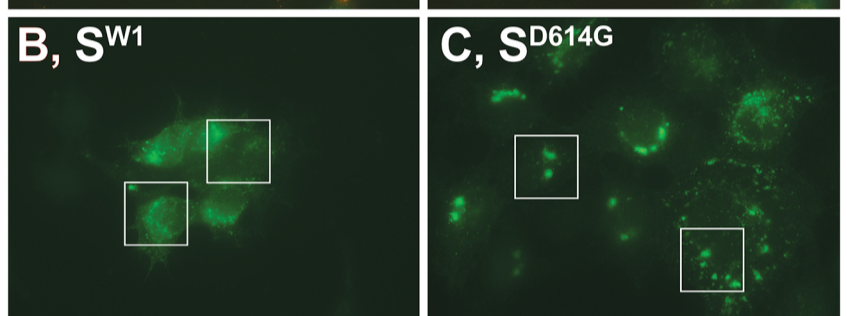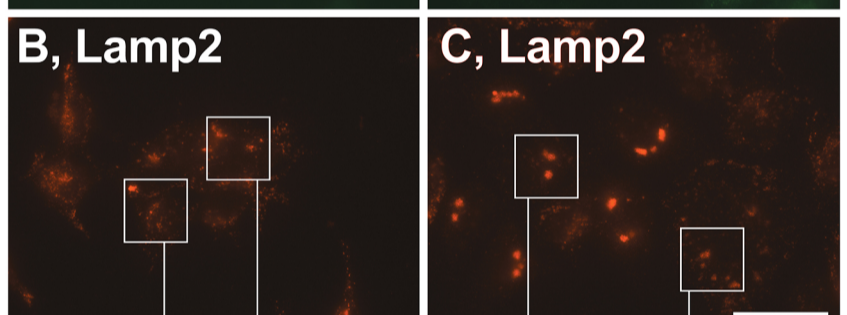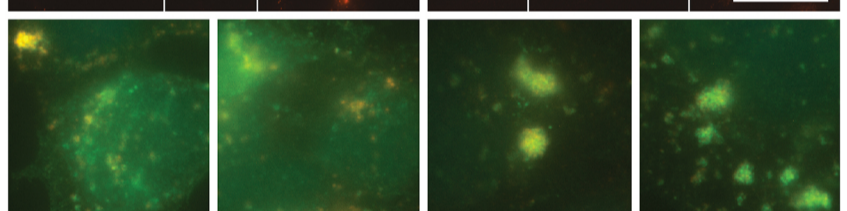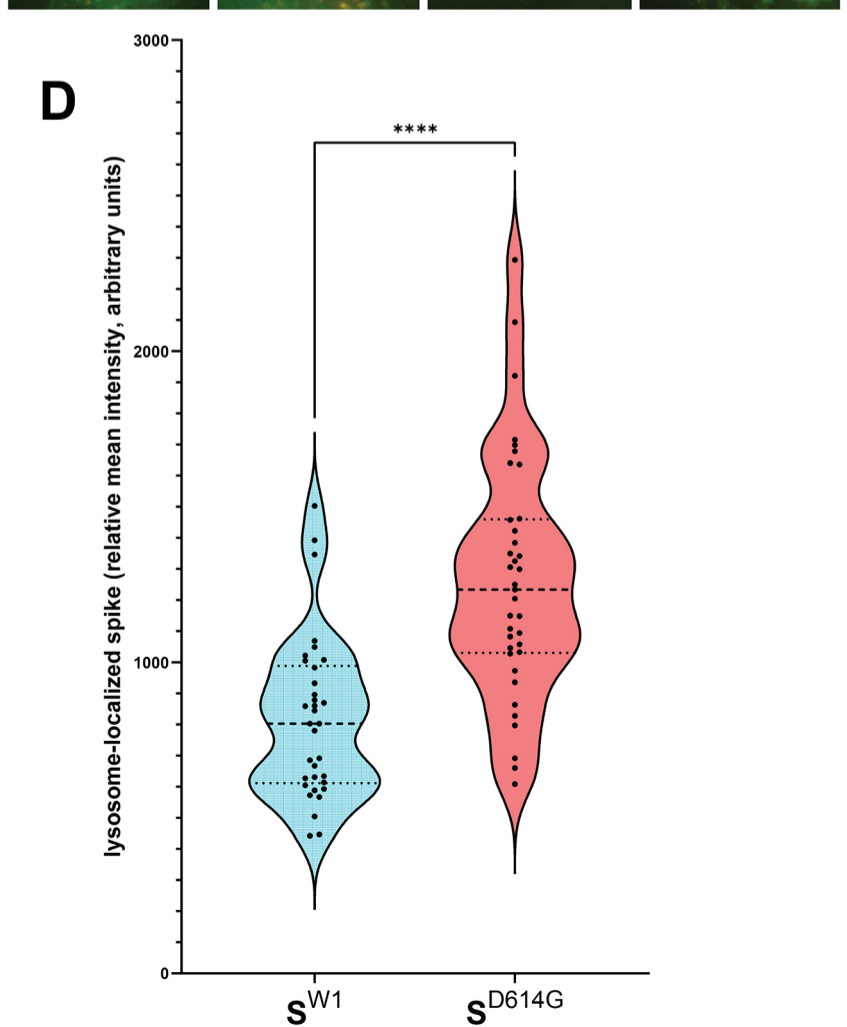

**Figure 6**

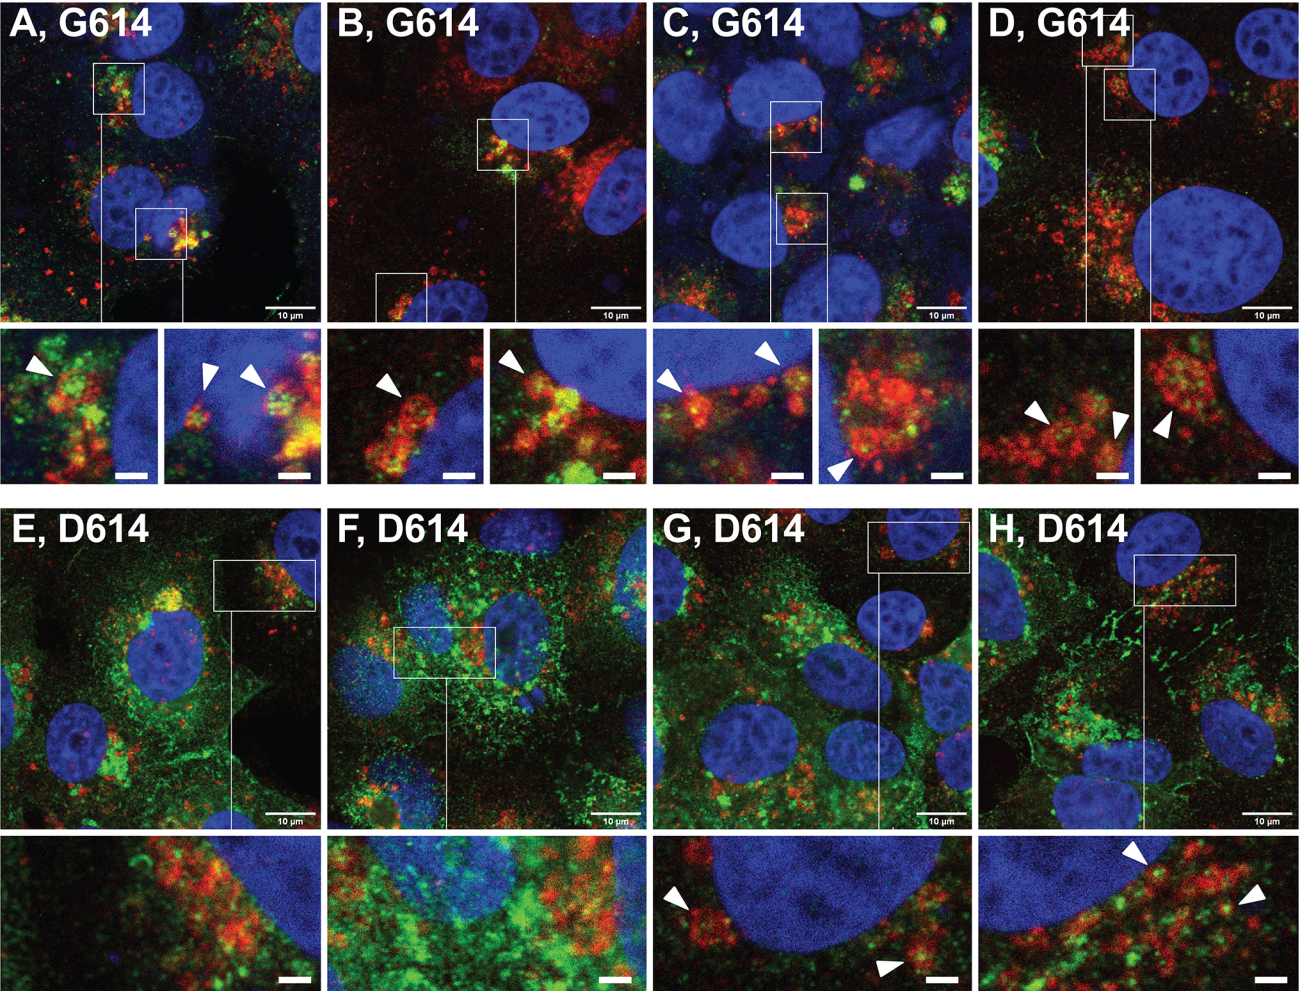

**Figure 7**

Htet1  
Htet1/N -dox  
Htet1/N +dox  
Htet1  
Htet1/S\*\* -dox  
Htet1/S\*\* +dox  
Htet1  
Htet1/M +dox  
Htet1/M +dox

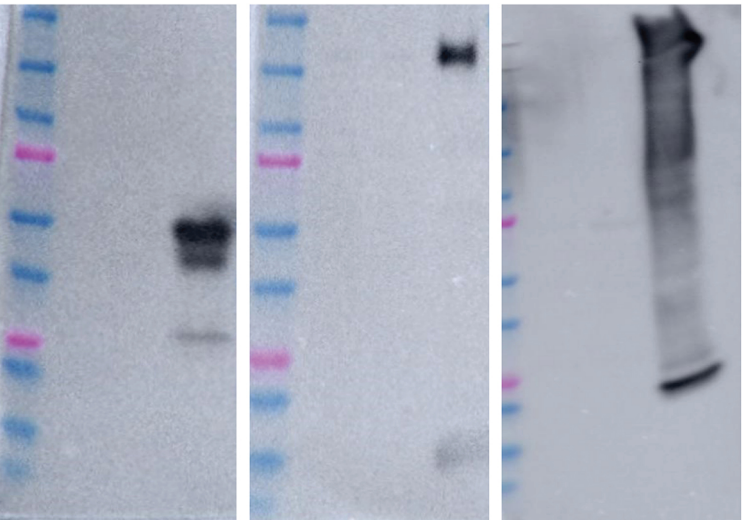

**Supplemental figure 1**



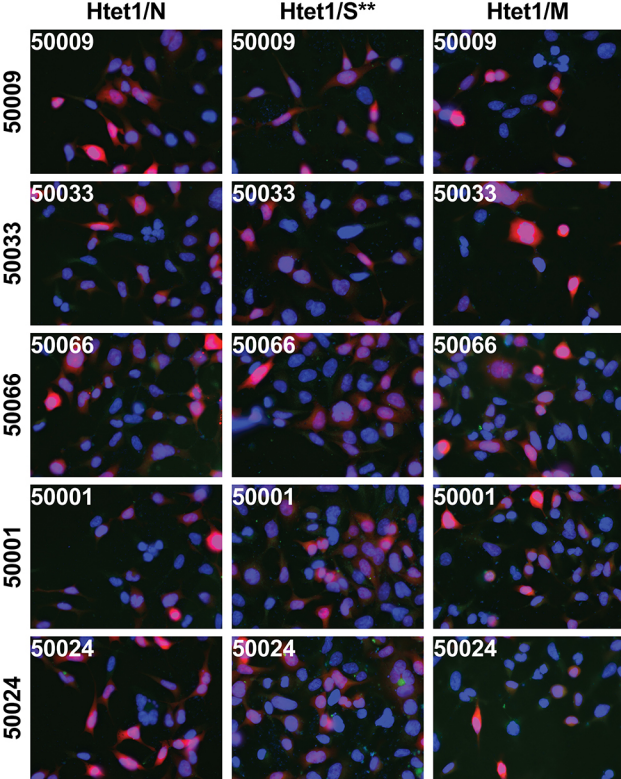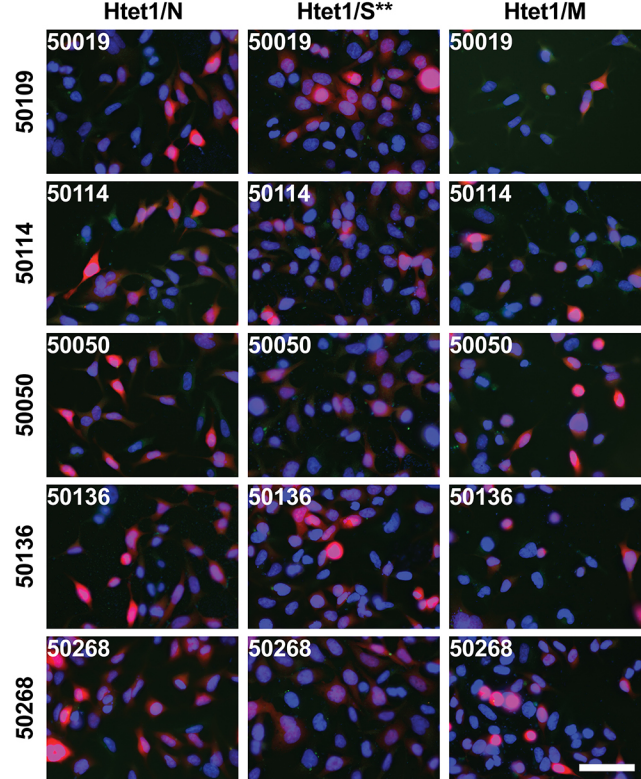

Supplemental figure 2

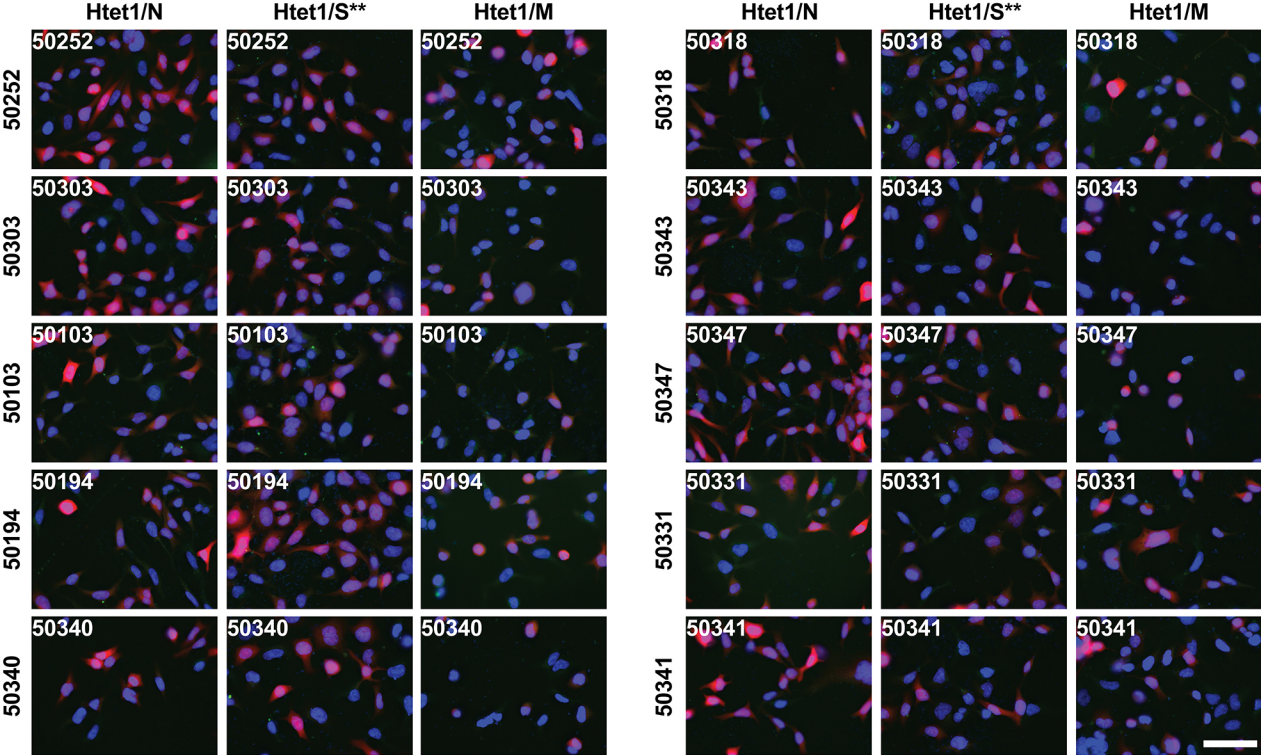

Supplemental figure 3



Supplemental figure 4

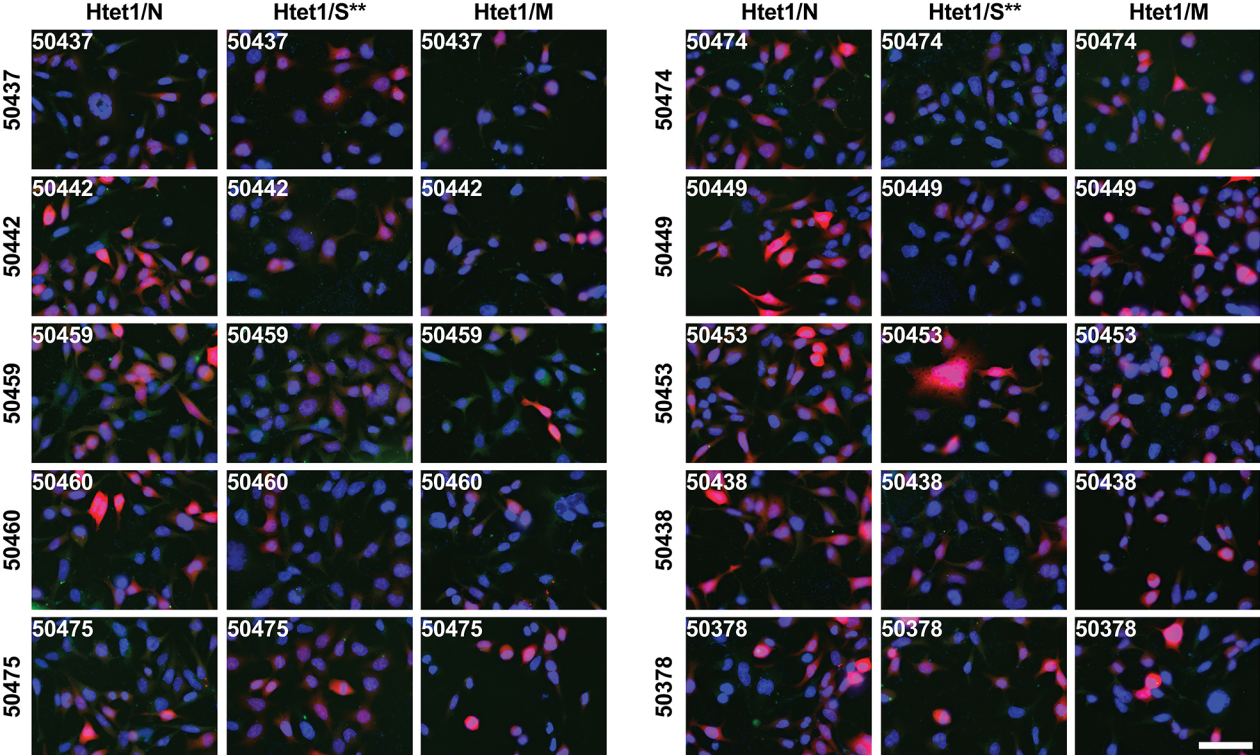

Supplemental figure 5

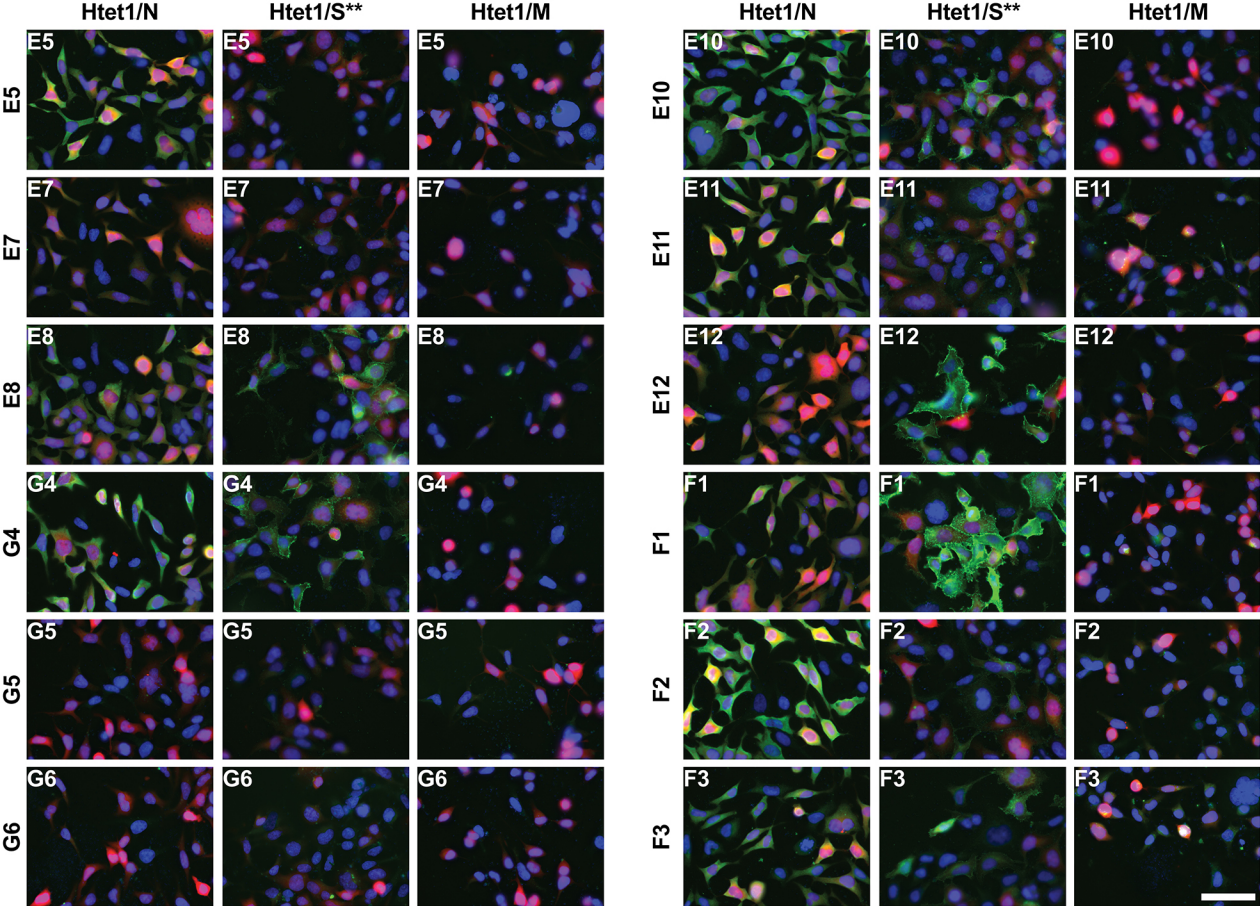

Supplemental figure 6

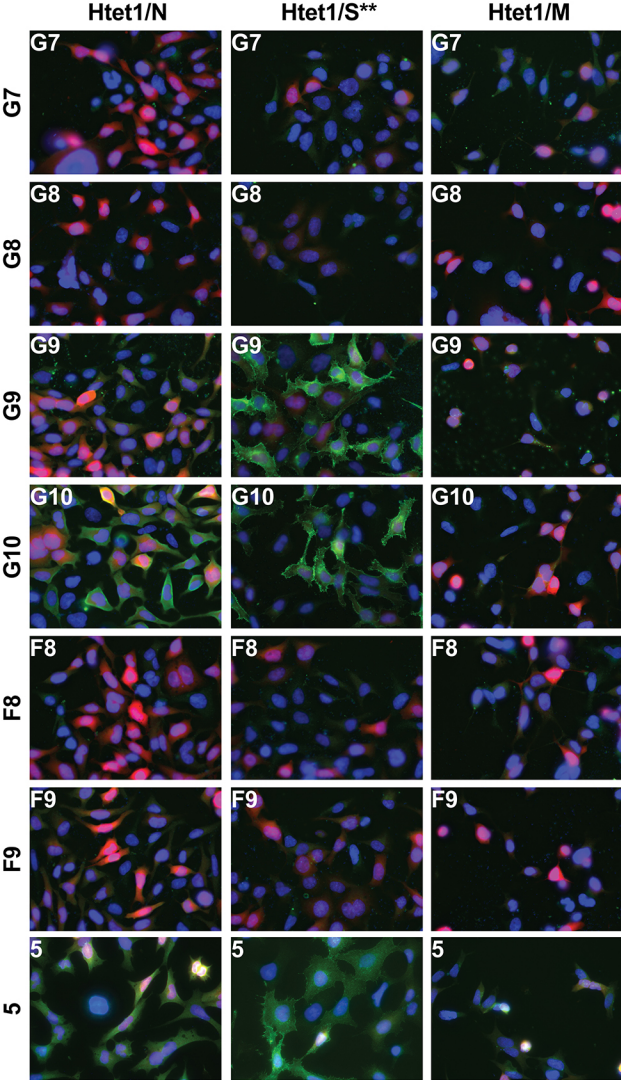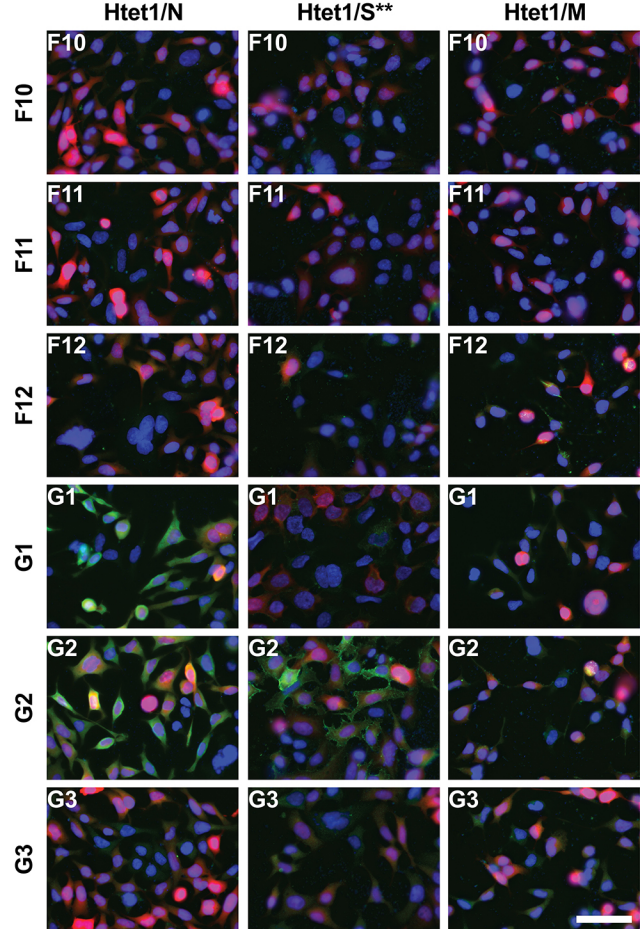

Supplemental figure 7

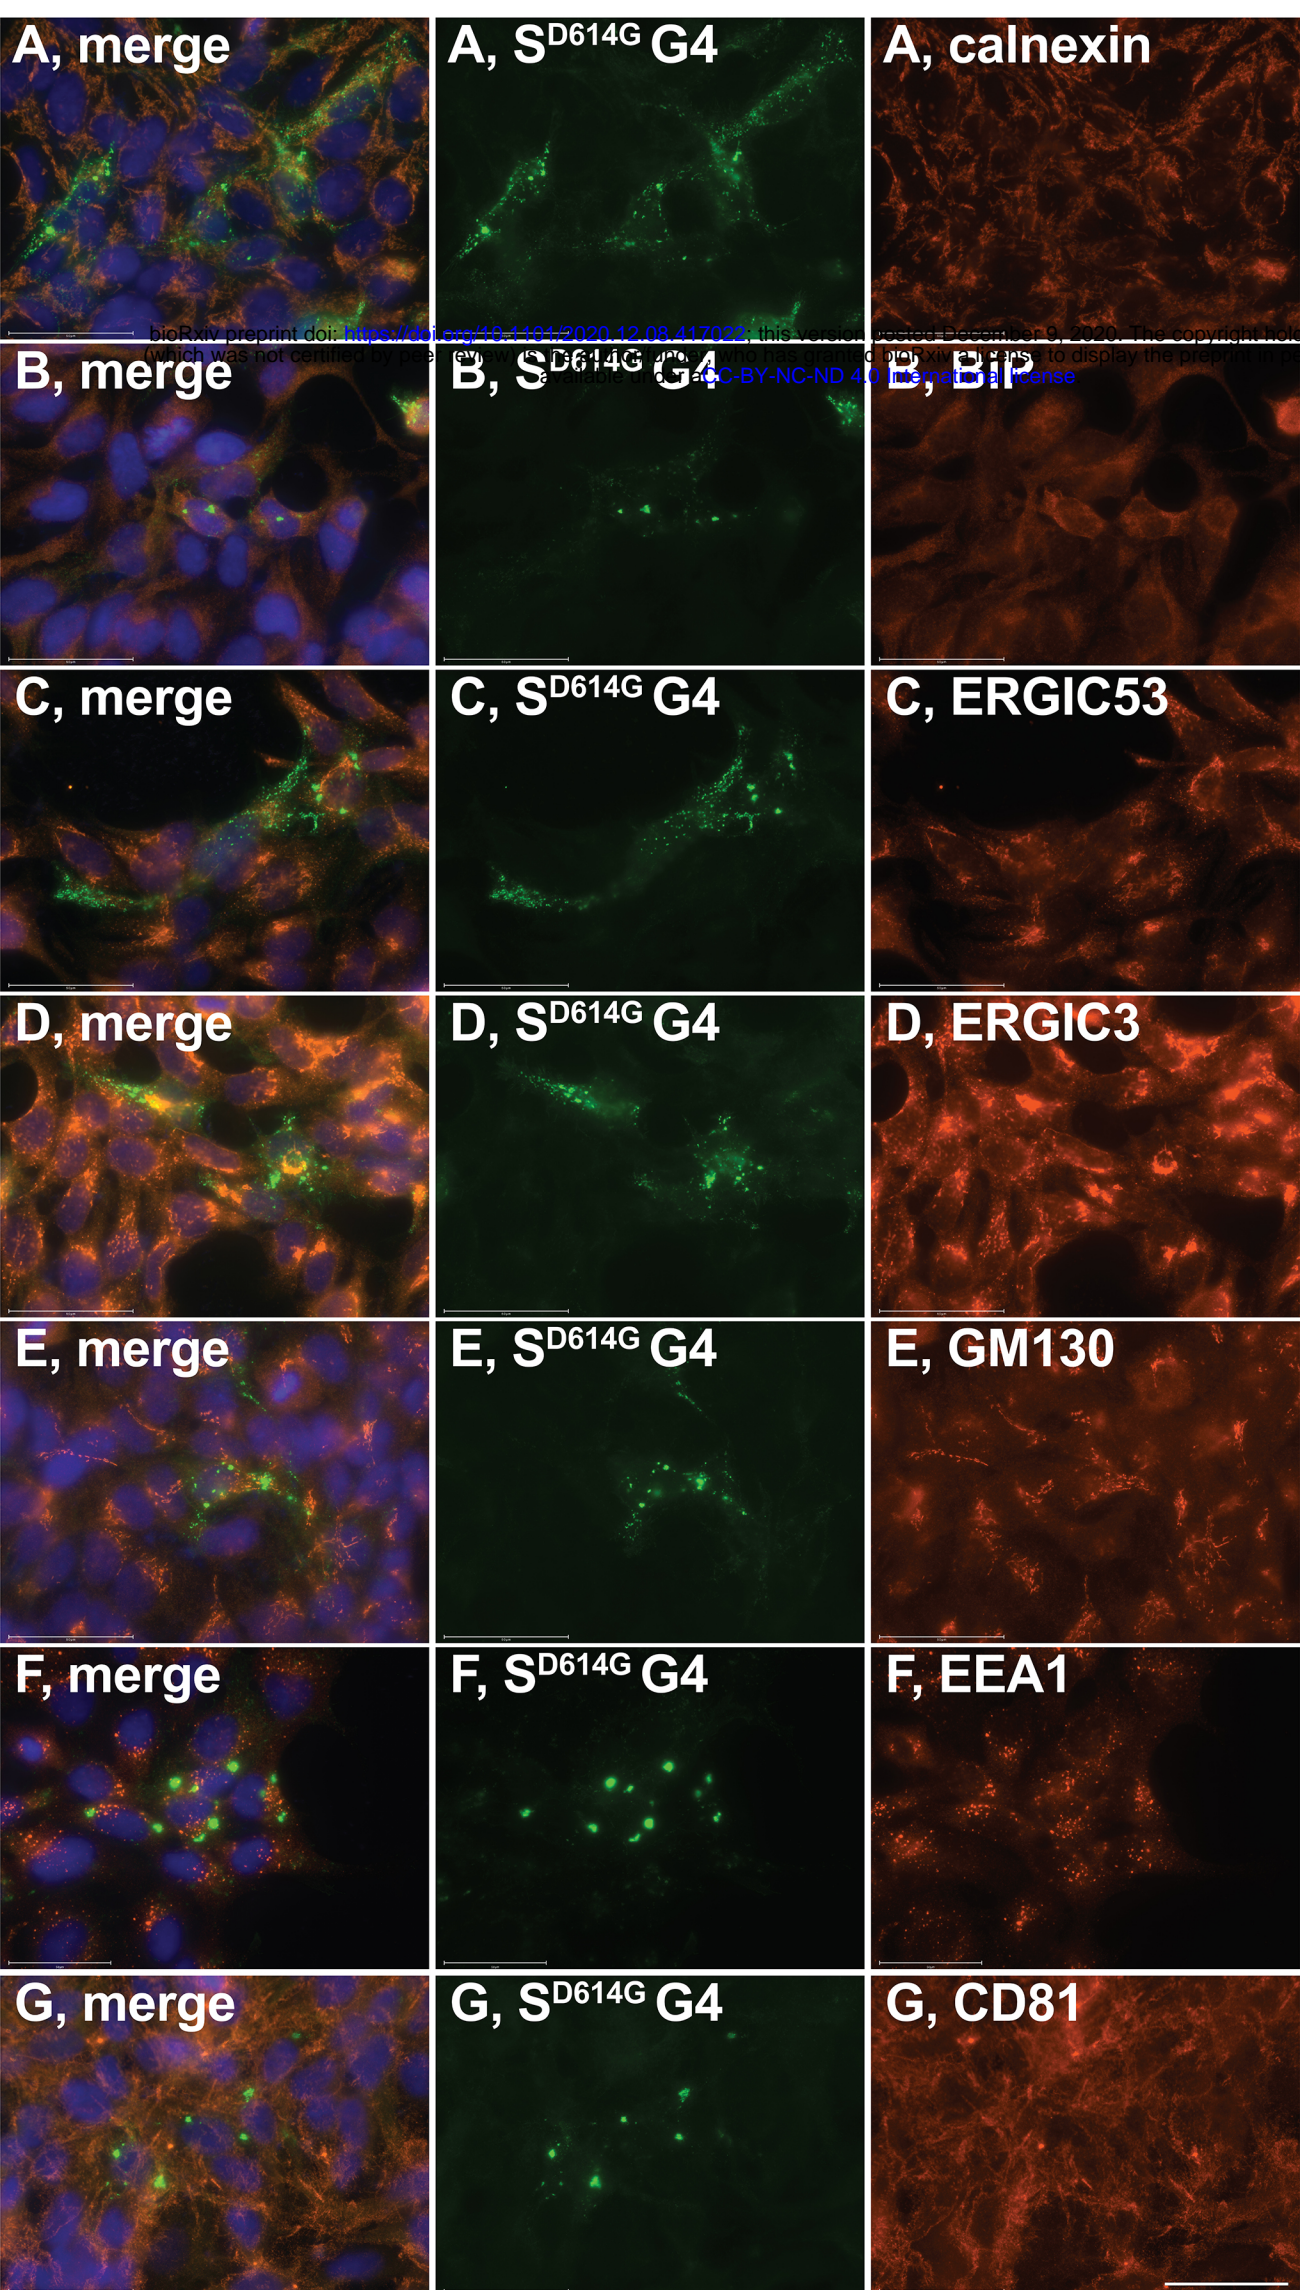

**Supplemental figure 8**
